1 The heterogeneous distribution of extracellular adenosine reveals a myeloid-dependent axis,  
2 shaping the immunosuppressive microenvironment in pancreatic ductal adenocarcinoma

3

4 Vincenzo Graziano<sup>1,2</sup>, Andreas Dannhorn<sup>3\*</sup>, Heather Hulme<sup>3\*</sup>, Kate Williamson<sup>4\*</sup>, Hannah  
5 Buckley<sup>1</sup>, Sheng Y. Lee<sup>1</sup>, Brajesh P. Kaistha<sup>1#</sup>, Sabita Islam<sup>1,2,5</sup>, James E. D. Thaventhiran<sup>4</sup>,  
6 Frances M. Richards<sup>1°</sup>, Richard Goodwin<sup>3</sup>, Rebecca Brais<sup>6</sup>, Simon J. Dovedi<sup>7</sup>, Alwin G.  
7 Schuller<sup>8</sup>, Jim Eyles<sup>7</sup>, Duncan I. Jodrell<sup>1,5</sup>

8 <sup>1</sup>Cancer Research UK Cambridge Institute, University of Cambridge, Cambridge, UK

9 <sup>2</sup>Cancer Research UK Cambridge Centre, University of Cambridge, Cambridge, UK

10 <sup>3</sup>Imaging and Data Analytics, Clinical Pharmacology and Safety Sciences (CPSS),  
11 AstraZeneca, Cambridge, UK

12 <sup>4</sup>Medical Research Council Toxicology Unit, University of Cambridge, Cambridge, CB2  
13 1QW, UK

14 <sup>5</sup>Department of Oncology, University of Cambridge, Cambridge UK

15 <sup>6</sup>Department of Pathology, Cambridge University Hospitals NHS Foundation Trust, CB2 0QQ  
16 Cambridge, UK.

17 <sup>7</sup>Oncology R&D, Research and Early Development, AstraZeneca, Cambridge, UK

18 <sup>8</sup>Oncology R&D, Research and Early Development, AstraZeneca, Waltham, USA

19 \*These authors contributed equally to this work

20 # Brajesh P. Kaistha current address: Oncology R&D, Research and Early Development,  
21 AstraZeneca Cambridge, UK

22 ° Frances M. Richards current address: Oncology R&D, Translational Medicine, AstraZeneca,  
23 Cambridge, UK

24

25 **Running title**

26 Extracellular adenosine controls the immunosuppressive microenvironment of PDAC

27 **Keywords**

28 Pancreatic cancer, adenosine pathway, immunotherapy, pro-tumorigenic macrophages, tumour  
29 microenvironment

30 **Financial support:**

31 All CRUK CI authors received research funding from Cancer Research UK (Nos.  
32 C14303/A17197 and C9545/A29580). The Li Ka Shing Centre where this work was performed  
33 was generously funded by CK Hutchison Holdings Limited, the University of Cambridge,  
34 CRUK, The Atlantic Philanthropies and others. This work was supported by Cancer Research  
35 UK (C9685/A27444) to VG. This study was also funded by Cancer Research UK Precision  
36 Panc grant C96/A25238. HB is funded by the University of Cambridge Experimental Medicine  
37 Training Initiative programme in partnership with AstraZeneca (EMI-AZ) and SYL is funded  
38 by the Cambridge Trust (Cambridge International Scholarship). Work by JT and KW is funded  
39 by a core grant award from the MRC (MC\_UU\_00025/12).

40 **Corresponding authors:**

41 **Vincenzo Graziano:** Cancer Research UK Cambridge Institute, University of Cambridge, Li  
42 Ka Shing Centre, Robinson Way, Cambridge, CB2 0RE, United Kingdom. Email:  
43 [vincenzo.graziano@cruk.cam.ac.uk](mailto:vincenzo.graziano@cruk.cam.ac.uk)

44 **Duncan Jodrell:** Cancer Research UK Cambridge Institute, University of Cambridge, Li Ka  
45 Shing Centre, Robinson Way, Cambridge, CB2 0RE, United Kingdom; Department of  
46 Oncology, University of Cambridge, Cambridge, CB2 0XZ, United Kingdom. Email:  
47 [dij21@cam.ac.uk](mailto:dij21@cam.ac.uk)

48

49 **Authors' disclosures:**

50 AD, HH, BPK, FMR, RG, SJD, AGS and JE are AstraZeneca employees and own company  
51 stocks and shares. HB holds a studentship partially funded by AstraZeneca.

52

53

54

55

56 **Abstract**

57 The prognosis for patients with pancreatic ductal adenocarcinoma (PDAC) remains extremely  
58 poor. It has been suggested that the adenosine pathway contributes to the ability of PDAC to  
59 evade the immune system and its resistance to immunotherapies (Immuno-Oncology Therapy,  
60 IOT), by generating extracellular adenosine (eAdo).

61 Using syngeneic genetically engineered mouse allograft models of PDAC with differential  
62 immune infiltration and response to IOT, we showed enrichment of the adenosine pathway in  
63 tumour-infiltrating immune cells (in particular, myeloid populations). Extracellular adenosine  
64 distribution is heterogeneous in tumours, with high concentrations in hypoxic margins that  
65 surround necrotic areas, associated with a rich myeloid infiltration. Pro-tumorigenic M2  
66 macrophages express high levels of the Adora2a receptor; particularly in the IOT resistant  
67 model. Blocking the *in vivo* formation and function of eAdo (Adoi), using a combination of  
68 anti-CD73 antibody and an Adora2a inhibitor slowed tumour growth and reduced metastatic  
69 burden. In addition, blocking the adenosine pathway improved the efficacy of combinations  
70 of cytotoxic agents or immunotherapy. Finally, Adoi remodelled the tumour microenvironment  
71 (TME), as evidenced by reduced infiltration of M2 macrophages and Tregs. RNAseq analysis  
72 showed that genes related to immune modulation, hypoxia and tumour stroma were  
73 downregulated following Adoi and a specific adenosine signature derived from this is  
74 associated with a poorer prognosis in PDAC patients.

75 The formation of eAdo appears to promote the development of the immunosuppressive TME  
76 in PDAC, contributing to its resistance to conventional and novel therapies. Therefore,  
77 inhibition of the adenosine pathway may represent a strategy to modulate the stroma and  
78 improve therapy response in patients with PDAC.

79

80

## 81 **Introduction**

82 Survival for patients with pancreatic ductal adenocarcinoma (PDAC) has not changed  
83 significantly in the last 50 years and remains poor ([https://www.cancerresearchuk.org/health-](https://www.cancerresearchuk.org/health-professional/cancer-statistics-for-the-uk)  
84 [professional/cancer-statistics-for-the-uk](https://www.cancerresearchuk.org/health-professional/cancer-statistics-for-the-uk)). There is a need for new treatments, given that  
85 current standard of care for patients with metastatic disease is associated with low survival,  
86 with less than 10% living more than 2 years (1). In addition to relative resistance to  
87 conventional therapies, cancer immunotherapy (Immuno-Oncology Therapy, IOT) is also  
88 ineffective in this disease, except in the small group of patients (1-2%) with microsatellite  
89 instability/mismatch repair deficient (MSI-H/dMMR) tumours (2). Several authors consider  
90 that the reason for this resistance can be ascribed to the low mutational burden of this neoplasm,  
91 which leads to lymphocyte exclusion and anergy (3,4). However, the tumour  
92 microenvironment in PDAC has been shown to be populated by a rich variety of immune cells,  
93 but most of them bear strong immune suppressive features, which contribute to the resistance  
94 to immunotherapy (5).

95 The adenosine pathway is an immunosuppressive axis which has gained much attention  
96 in cancer immunology for its role in suppressing the immune activation associated with  
97 cytotoxic treatments (chemotherapy, targeted therapy and radiotherapy) (6). This has led to  
98 the clinical evaluation of inhibitors of the pathway in combination with more conventional  
99 approaches (7). The adenosine pathway involves conversion of extracellular ATP (eATP), a  
100 powerful immune activator, to extracellular adenosine (eAdo) by the ectonucleotidases CD39  
101 and CD73 (8). eADO has been linked to cancer in several studies that have demonstrated that  
102 its concentration in different tumour tissues is several folds higher than normal tissues (6,9).  
103 CD39 is overexpressed in a subpopulation of exhausted tumour-infiltrating T-cells (10,11) and  
104 its expression correlates with another marker of immunosuppression (PD1 expression) (11).  
105 CD39 and CD73 has a role in the aggressiveness of adult glioblastoma (12), where they are

106 expressed on infiltrating macrophages (13,14). The adenosine signature recently published by  
107 Sidders and colleagues (15) shows that this pathway correlates with resistance to  
108 immunotherapies and is associated with other genetic features of tumour aggressiveness, such  
109 as p53 mutations. The abundant presence of eAdo in the microenvironment can dampen  
110 immune activation through the stimulation of a pro-tumorigenic stroma. This is mostly  
111 orchestrated by macrophages and myeloid derived suppressive cells (MDSCs) (16,17),  
112 favouring a tolerogenic function of dendritic cells (DCs) (18-20) which results in inhibition of  
113 T-cells/NK activation (21,22).

114 The myeloid populations play a pivotal role in the aggressiveness of many cancer types  
115 and in particular, pancreatic adenocarcinoma. For instance, the presence of pro-tumorigenic  
116 population of macrophages (23,24) and myeloid-derived suppressive cells (MDSCs) (25)  
117 infiltrating the microenvironment, is associated with a poor survival and correlates with  
118 immune exclusion of PDAC. Macrophages can elicit the secretion of cytokines which can on  
119 one hand, favour the proliferation and invasiveness of cancer cells while interacting with  
120 cancer-associated fibroblasts (26-28), and on the other hand induce anergy and physical  
121 exclusion of adaptive immune cells (29-31). Targeting macrophages in a pre-clinical  
122 pancreatic cancer model has been demonstrated to be effective to obtain tumour regression and  
123 reduce metastatic formation (32). Unfortunately, this approach has not translated into clinical  
124 benefit, which in part can be explained by the fact that the global reduction of the tumour-  
125 infiltrating macrophages can be biologically different from reprogramming distinct tumour  
126 associated macrophages (TAM) subtypes (28).

127 Some recent publications link the adenosine pathway to the biology and aggressiveness  
128 of PDAC, which has been shown to have an increased adenosine pathway RNA signature  
129 resulting in a worse prognosis (15), and receptors for eAdo as well as CD73 have been found  
130 to be overexpressed in bulk-RNA sequencing (RNAseq) when comparing tumours to normal

131 pancreatic tissue (33). Further, pancreatic cancer cells are known to be strongly CD73 positive  
132 (34). However, little is known about the complex mechanism generated by the adenosine  
133 pathway resulting in the immunosuppressive characteristics of pancreatic cancer  
134 microenvironment and stroma, in particular the role that the adenosine pathway has in shaping  
135 the immune infiltration of this disease.

136 Here, we propose a model where the tumour-infiltrating immune cell populations of  
137 PDAC cancer generate an axis of immunosuppression, where extracellular adenosine produced  
138 mostly in hypoxic regions of the tumour (identified using Mass Spectrometry Imaging),  
139 enriched for the myeloid cell infiltration, ultimately stimulates other myeloid subpopulations  
140 themselves, in particular pro-tumorigenic M2 macrophages. Blocking the adenosine pathway  
141 in an IOT-resistant PDAC model, which expresses this axis more than IOT-responsive  
142 comparator, strongly suppresses the formation of extracellular adenosine and reshapes the  
143 immune microenvironment, favouring disease control when combined with cytotoxic  
144 treatments and immunotherapies. Bulk RNAseq gene analysis confirms the role of this  
145 findings in PDAC survival, underpinning the importance of further studies for understanding  
146 the biological complexity and the clinical utility of the adenosine pathway inhibition.

## 147 **Methods and materials**

### 148 **Cell lines and chemicals**

149  $Kras^{LSL-G12D/+}$ ;  $Trp53^{LSL-R172H/+}$ ;  $Pdx1-Cre$ ;  $Rosa26^{YFP/YFP}$  (KPCY)-derived cell lines  
150 2838c3, 6499c4, 6620c1 (IOT responsive), 6419c5, 6694c2 and 6422c1 (IOT resistant) were a  
151 kind gift from Ben Stanger (University of Pennsylvania). The cell lines were obtained from  
152 single cell cloning strategy, as described previously, and were generated from tumours  
153 developed in KPCY mice with C57BL/6 background (35). Cells were grown up to 20 passages  
154 in DMEM (with pyruvate, L-glutamine and D-glucose; Gibco, #41966029) supplemented with

155 5% FBS (Gibco, #10270106). All the cell lines were analysed for STR fingerprinting and  
156 mycoplasma testing routinely.

### 157 **Mice and *in vivo* experiments**

158 Mice experiments were performed in the animal facility (Biological Resource Unit,  
159 BRU) of the CRUK Cambridge Institute, in accordance with the UK Animals Scientific  
160 Procedures Act 1986, with approval from the CRUK Cambridge Institute Animal Ethical  
161 Review and Welfare Body. 8-12 week old C57BL/6 mice were used for *in vivo* experiments  
162 and were purchased from Charles River (UK).  $Kras^{LSL-G12D/+}$ ;  $Trp53^{LSL-R172H/+}$ ; Pdx1-Cre  
163 (KPC) mice were obtained from a breeding colony maintained by the CRUK-CI Genome  
164 Editing Core team. Tumours were detected by palpation followed by ultrasound imaging by  
165 the Genome Editing Core. Tissues from KPC mice were provided once tumour dimensions or  
166 health status rendered them unsuitable for therapeutic studies. KPC mice were killed when  
167 showing clinical signs of the disease.

168 Tumour allograft studies were performed with technical assistance from CRUK-CI BRU staff.  
169 Mice were subcutaneously injected in the right flank with  $1 \times 10^6$  KPCY-derived cells in 50%  
170 PBS and 50% Matrigel basement membrane matrix (#354234, Corning). In the interventional  
171 experiments, mice were treated as indicated, starting 12-14 days from tumour cells  
172 implantation, to allow the microenvironment to establish. Tumour volume was calculated  
173 using the formula;  $(\pi/6) * (\text{width})^2 * \text{length}$ . Tumour response was defined based on the % of  
174 change of the longest diameter from start of therapy (stable disease < 20% increase and < 30%  
175 decrease of target lesion RECIST v. 1.1). Mice were then killed at specific endpoints (e.g. 14  
176 days from start of treatment) or when the tumour reached  $2000 \text{ mm}^3$  (or before in case of  
177 appearance of clinical signs). When indicated the following drugs were used: AZD6738  
178 (ATRi; 25 mg/kg daily for 4 days), AZD4635 (Adora2ai; 50 mg/kg bid), 2c5mIgG1 (anti-



179 CD73; 10 mg/kg twice weekly), AB740080 D265A (anti-PD-L1: 10 mg/kg twice weekly),  
180 NIP228 mouse IgG1 control kappa (isotype; 10 mg/kg twice weekly) and NIP228 muIgG1  
181 D265A (isotype; 10 mg/kg twice weekly) were provided by Astrazeneca; gemcitabine  
182 hydrochloride (Tocris, 3259) was used at 100 mg/kg twice weekly; inVivoPlus anti-CD40  
183 (clone FGK4.5/FGK45; bioxcell BE0016-2) and InVivoPlus rat IgG2a isotype control, anti-  
184 trinitrophenol (clone 2A3; bioxcell BE0089) were used as a single injection of 100 µg.  
185 InVivoPlus anti-CTLA-4 (clone 9H10; bioxcell BP0131) or InVivoPlus isotype control  
186 polyclonal Syrian hamster IgG (bioxcell BP0087): 200 µg/dose x 3 times.

### 187 **Clonogenic assay**

188 KPCY-derived cells were seeded at 200 cells/well in a 6-well plate. After 24 hours,  
189 cells were treated with different concentrations of anti-CD73 (2c5mIgG1) antibody (1, 10, 100  
190 µg/ml) or isotype (NIP228 mouse IgG1 control kappa) for 8 days. Antibodies were added every  
191 3 days. On day 8, colonies were stained with SRB protocol previously described (36). Images  
192 were taken and analysed using GelCount (Oxford Optronix). Colony forming efficiency was  
193 calculated as a ratio between number of colonies and number of plated cells. Surviving  
194 fractions were calculated as the ratio between wells treated with anti-CD73 antibody and the  
195 ones treated with isotype. At least 3 wells per condition were plated for each of the 3  
196 experimental replicates.

### 197 **IncuCyte time lapse imaging**

198 KPCY-derived cells were plated at 2500 cells/well density in a 96-well black-wall plate  
199 (at least 3 wells per condition). Cells were grown in cell culture media supplemented with the  
200 indicated concentration of anti-CD73 (2c5mIgG1) or isotype (NIP228 mouse IgG1 control  
201 kappa) antibody in triplicate. Images were acquired with 10x objective, every 3 hours from 3  
202 different fields per well using Incucyte Live cells imaging microscope (Essen Bioscience).

203 Confluence was calculated as the average of the 3 fields using the Incucyte algorithm.

204 Experiments were repeated at least 3 times.

### 205 **Single cell suspension preparation**

206 For experiments in s.c. allografts, tumours were weighed and placed in RPMI and finely  
207 minced with a scissor in a 2 ml tube which was then washed with up to 2.5 ml of digestion  
208 buffer (Tumour dissociation kit, Miltenyi, 130-096-730) plus Deoxyribonuclease I (300 µg/ml,  
209 Sigma, DN25-1G). Dissociation was performed using the protocol suggested by Miltenyi. For  
210 KPC tumours, a trypsin inhibitor (250 µg/ml, Sigma, T6522) was added to the digestion buffer.  
211 Following the digestion, the samples were passed through a 70 µM strainer filter (Grainer Bio-  
212 one, 542-070), washing with MACS buffer (PBS + 0.1% FBS and 2nM EDTA).

213 Splensens, inguinal and mesenteric lymph nodes were mashed on a 100 µM filter (Grainer  
214 Bio-one, 542-000) over a 50 ml tube, using a syringe plug and the filter was washed with  
215 MACS buffer and centrifuged (at 4° C as for all the following centrifugation). Red cell lysis  
216 buffer (1 ml; 0.15M Ammonium Chloride; 10mM Potassium hydrogen carbonate; 0.1mM  
217 EDTA; pH 7.4 (adjusted with KOH) was then used to resuspend splenocytes, 3 minutes at room  
218 temperature and then washed with MACS buffer and centrifuged at 300g for 5 minutes.  
219 Samples were eventually resuspended in 200-400 µl of MACS buffer.

### 220 **Flow cytometry**

221 Single cell suspensions were aliquoted in a round-bottom 96 well/plate (Costar, 3879)  
222 and stained with live/dead fixable stain (Invitrogen, L34962; 1:100 in PBS) for 10 minutes at  
223 room temperature. After washing in MACS buffer, cells were FC-blocked with anti-CD16/32  
224 antibody (Biolegend, 101320; 1:100) for 5 minutes. Then, antibodies for surface staining were  
225 added and incubated at 4° C degrees for 30 minutes. After washing, cells were fixed with FACS  
226 fix buffer [PBS + 1% Formaldehyde + 0.02 g/ml Glucose + 0.02% Sodium Azide] for 10

227 minutes and then washed and resuspended in MACS buffer for FACS analysis. For intracellular  
228 staining, cells were fixed with fixation/permeabilization buffer for 15 minutes, then washed in  
229 perm buffer and stained with the relevant antibody in perm buffer for 60 minutes. Cells were  
230 then washed and resuspended in MACS buffer for FACS analysis. Samples were acquired  
231 using BD-Symphony flow cytometer and the generated FCS files were analysed using FlowJo  
232 V10 software. The following antibodies were used and gating strategies is shown in the  
233 supplementary figures: BV786-CD45 (BD Biosciences, 564225; 1:200), APC/Fire750-CD3  
234 (Biolegend, 100248; 1:50), BV650-CD8 (Biolegend, 100741; 1:100), BV711-CD4 (Biolegend,  
235 100549; 1:200), APC-Foxp3 (Invitrogen, 17-5773-82; 1:100) , FITC-CD19 (Biolegend,  
236 115505; 1:200) , BV510-CD11b (Biolegend, 101245; 1:200), PerCP/Cy5.5-CD44 (Biolegend,  
237 103031; 1:200), BV421-PD1 (Biolegend, 135218; 1:100), BV421-PD-L1 (Biolegend, 124315;  
238 1:100), PE/Cy7-CD39 (Biolegend, 143805; 1:100), PE-CD73 (Biolegend, 127206; 1:100),  
239 FITC-F4/80 (Biolegend, 123108; 1:200), PE/Cy7-CD206 (Biolegend, 141719; 1:100),  
240 PerCP/Cy5.5-Ly6C (Biolegend, 128012; 1:100), APC/Cy7-Ly6G (Biolegend, 127624; 1:100),  
241 AF700-MHCII (Biolegend, 107629; 1:200), PE-CD11c (eBioscience, 12-0114-83; 1:200) ,  
242 BV605-NKp46 (Biolegend, 137619; 1:25), APC-Adora2a (Novus Biotech, NBP1-39474APC;  
243 1:150) , APC-CD86 (Biolegend, 105012; 1:100). Gating strategy for immune subpopulations  
244 is shown in supplementary figure 1A-B. For CD73 in vitro staining of KPCY-derived cell lines,  
245 cells were stained as described above with live/dead fixable stain and PE-CD73 antibody and  
246 analysed with BD-Symphony flow cytometer. For in vitro treatment, cells were treated with  
247 anti-CD73 (2c5mIgG1) or isotype (NIP228) antibody at a concentration of 10 µg/ml for 24  
248 hours. Competitive staining was performed before this experiment to confirm there was no  
249 competition between 2c5mIgG1 and TY11.8 (PE-CD73) clones (data not shown).

250 **Tissue preparation for Mass Spectrometry Imaging (MSI) and Imaging Mass Cytometry**  
251 **(IMC) analysis.**

252 Tumours were snap frozen in liquid nitrogen immediately after resection and the tissues  
253 were embedded in a HPMC/PVP hydrogel as previously described (36). Sectioning was  
254 performed on a CM3050 S cryostat (Leica Biosystems, Nussloch, Germany) at a section  
255 thickness of 10  $\mu\text{m}$  and the tissue sections were immediately thaw mounted and dried under a  
256 stream of nitrogen and sealed in vacuum pouches to preserve the metabolic integrity of the  
257 sections. Tissue sections for DESI-MSI and IMC were thaw-mounted onto Superfrost  
258 microscope slides (Thermo Scientific Waltham, MA, USA), whilst sections prepared for  
259 MALDI-MSI were thaw mounted onto conductive ITO coated slides (Bruker Daltonik,  
260 Bremen, Germany). Polyvinylpyrrolidone (PVP) (MW 360 kDa) and (Hydroxypropyl)-  
261 methylcellulose (HPMC) (viscosity 40-60 cP, 2 % in H<sub>2</sub>O (20 C) were purchased from Merck  
262 (Darmstadt, Germany). Methanol, water, iso-pentane and isopropyl alcohol were obtained from  
263 Fisher Scientific (Waltham, MA, USA).

#### 264 **Mass Spectrometry Imaging (MSI)**

265 DESI-MSI analysis was performed on a Q-Exactive mass spectrometer (Thermo  
266 Scientific, Bremen, Germany) equipped with an automated 2D-DESI ion source (Prosolia Inc.,  
267 Indianapolis, IN, USA) operated in negative ion mode, covering the applicable mass range up  
268 to a  $m/z$  of 1000, with a nominal mass resolution of 70,000. The injection time was fixed to  
269 150 ms resulting in a scan rate of 3.8 pixel/s. The spatial resolution was adapted between  
270 experiments to allow acquisition of the data for all directly compared samples within a single  
271 experiment of 48 h, with pixel sizes ranging from 65-75  $\mu\text{m}$ . A home-built Swagelok DESI  
272 sprayer was operated with a mixture of 95% methanol, 5% water delivered with a flow rate of  
273 1.5  $\mu\text{L}/\text{min}$  and nebulized with nitrogen at a backpressure of 6 bar. The resulting .raw files  
274 were converted into .mzML files using ProteoWizard msConvert (37) (version 3.0.4043) and  
275 subsequently compiled to an .imzML file (imzML converter (38) version 1.3). All subsequent

276 data processing was performed in SCiLS Lab (version 2021b, Bruker Daltonik, Bremen,  
277 Germany).

278 MALDI-MSI analysis was performed on a RapifleX TissueTyper instrument (Bruker Daltonik,  
279 Bremen, Germany) operated in negative detection mode. 9-Aminoacridine (9-AA) prepared in  
280 80:20 methanol:water was used as a MALDI matrix and spray deposited using an automated  
281 spray system (M3-Sprayer, HTX technologies, Chapel Hill, NC, USA). MALDI experiments  
282 were performed with a spatial resolution of 50  $\mu\text{m}$ . A total of 400 laser shots were summed up  
283 per pixel to give the final spectra. For all experiments the laser was operated with a repetition  
284 rate of 10 kHz. All raw data was directly uploaded and processed in SCiLS lab (Version 2021b)  
285 software packages. All DESI and MALDI data and images were normalised to the total ion  
286 current (TIC) to compensate for signal variation across the course of the experiments. Data  
287 segmentation pipeline is shown in supplementary materials and methods.

### 288 **Imaging Mass Cytometry (IMC)**

289 Imaging mass cytometry was performed on a slide which had already been analysed by DESI-  
290 MSI. Antibodies used for IMC staining are shown in Table 1. Untagged antibodies were tagged  
291 in house, using Fluidigm Maxpar Antibody Labelling Kit, according to manufacturer's  
292 instructions. Following DESI-MSI analysis, the slide was fixed with 4% paraformaldehyde in  
293 phosphate-buffered saline (PBS) for 10 minutes. The slide was washed 3 x 5 minutes in PBS,  
294 permeabilized for 5 minutes with 1:1000 dilution of Triton X-100 in Casein Solution, washed  
295 3 x 5 minutes in PBS, and blocked for 30 minutes with Casein Solution. Antibodies were  
296 diluted to an appropriate concentration in Casein Solution and the slide incubated overnight  
297 with the antibody solution at 4 °C. The slide was washed 3 x 5 minutes in PBS and nuclei were  
298 stained with DNA Intercalator-iridium at a dilution of 1:400 in PBS for 30 minutes. The slide  
299 was washed 3 x 5 minutes in PBS, 30 seconds in deionized water, then dried for storage at

300 room temperature until analysis. A region for IMC analysis was selected using consecutive H  
301 and E stained sections and the DESI-MSI results. A box with approximately 2 x 1.8 mm area  
302 was selected for analysis to include necrotic, necrotic margin and viable tumour regions. IMC  
303 analysis was performed using a Hyperion instrument (Fluidigm Corporation, San Francisco,  
304 CA, USA) with an ablation energy of 6 db an ablation frequency of 200 Hz. IMC images were  
305 produced using MCD viewer (Version 1.0, Fluidigm) and analysis was performed using HALO  
306 (Indica labs). Tissue regions were classified using random forest with all markers included.  
307 Cells positive for each marker were manually optimised by setting a cell intensity threshold.  
308 Values for the numbers of positive cells for markers of interest were exported for analysis in  
309 Graphpad Prism v.8

### 310 **Immunohistochemistry (IHC)**

311 Immunohistochemistry was performed as previously described in the histopathology  
312 core at the CRUK CI. Briefly, tissues were removed from the mouse at the endpoint and  
313 immediately formalin-fixed for 24 hours. Fixed tissues were then processed, embedded in  
314 paraffin and sectioned (3  $\mu$ m sections). Following dewax and rehydration, as standard, antigen  
315 retrieval was performed using Leica's Epitope Retrieval Solution 2 (Tris EDTA) at 100° C for  
316 20 minutes. Additional protein block from Dako (X090930-2) was applied. The staining using  
317 anti-mouse CD8 (Cell signalling, #98941), anti-mouse Foxp3 (Affymetrix. #14-5773) and anti-  
318 mouse p53 (Novocastra; #NCL-L-p53-CM5p) antibodies, was performed on Leica's  
319 automated Bond-III platform in conjunction with their Polymer Refine Detection System  
320 (DS9800) and a modified version of their standard template. Slides were dehydrated and  
321 cleared in xylene on Leica's automated ST5020 before sections were mounted on Leica's  
322 coverslipper, CV5030 (mounting media: DPX Mountant for Histology; Sigma Aldrich, 06522-  
323 500ML) and scanned using a ScanScopeAT2 (Aperio Leica Biosystems). Quantification of  
324 viable tumour tissue was performed after exclusion of necrotic area using the Halo software v.

325 3.3.2541.405 (Indica Labs). Cell density was calculated as the number of positive cells x mm<sup>2</sup>  
326 of tumour tissue analysed. Sections of mouse spleen were used on each slide as internal control.  
327 For the analysis of the lung metastatic burden of any individual mouse, the 4 right lobes and  
328 the left lobe were cut in multiple pieces and together fixed and then embedded, then treated as  
329 above. A p53 staining was used for helping the detection of smaller lesions (min. of 5 cells).  
330 Analysis was performed using Halo software and expressed as % of metastatic areas/total lung  
331 area analysed. Mice with intra-abdominal/thoracic organs direct infiltration were excluded  
332 from the analysis.

### 333 **RNA sequencing**

334 RNA was extracted from tumour tissues weighing up to 30 mg. Tissues were firstly  
335 disrupted and homogenised using TissueLyser II and then RNA was extracted using Qiagen  
336 RNA kit, according to manufacturer instructions. RNA was then quantified using Qubit 3.0  
337 (life technologies) and purity and quality were assessed using Agilent 4150 (G2992AA)  
338 TapeStation system (Agilent). Library construction was followed by paired-end 50 bp  
339 sequencing on Novaseq 6000 sequencer.

### 340 **Bioinformatics analysis**

341 Sequencing files in FASTQ format were aligned against the GRCh38 mouse genome  
342 using HISAT2 with default parameters. Samtools was used to create, index and merge BAM  
343 files of reads from different lanes belonging to individual samples. FeatureCounts was utilized  
344 to quantify gene-level expression of transcripts. All downstream analyses were completed in R  
345 version 4.1.2. Prior to analysis, MSI data for sequenced samples were examined. From the  
346 vehicle-treated arm, sample 23719 showed minimal necrosis, low peri-necrotic adenosine and  
347 a high ATP/AMP ratio suggesting a very high energetic state. This identified the sample as a

348 potential outlier which was confirmed upon visual inspection of a PCA plot (Supplementary  
349 fig. 1C). It was excluded prior to downstream analysis.

350 For the remaining 11 samples, initially genes were filtered to maintain only genes that were  
351 expressed at a reasonable level in >5 treatment conditions using the filterByExpr() command  
352 from the edgeR package (ver 3.36.0) .

353 Differential gene expression analyses were performed on raw read counts of the combined data  
354 object of all 11 samples. To identify significantly expressed genes between treatment and  
355 control groups, we utilised a Wald test within the DESeq2 package (ver 1.34.0). Genes were  
356 considered differentially expressed when the analysis resulted in an adjusted P-value (corrected  
357 for multiple testing using the Benjamini and Hochberg method) below 0.05. The volcano plot  
358 was generated using the EnhancedVolcano package (ver 1.12.0) with the addition of custom  
359 code.

360 Gene set enrichment analysis (GSEA) of 712 genes identified as differentially expressed with  
361  $\text{padj} \leq 0.05$  and  $\log_2(\text{fold change}) \leq -0.58$  was performed via the Enrichr (suppl. table 2) server  
362 database for Kyoto Encyclopedia of Genes and Genomes (KEGG)  
363 (<https://www.genome.jp/kegg/>) pathways and Gene Ontology (GO): Biological Processes  
364 (<http://geneontology.org/>). Subsequently, enriched terms ranked for significance for each  
365 database were downloaded and are reported in Supplementary Table 4-5. Terms of interest  
366 were selected from the top 15 ranks in each table. Genes from this study which were shown to  
367 be enriched in these terms of interest were then selected to be displayed in a heatmap. Raw  
368 counts were normalised with DESeq2 prior to visualisation of gene expression levels with  
369 heatmap (ver 1.0.12). Please refer to the supplementary methods and materials references  
370 section for all of the above.

371 **Analysis of human PDAC available datasets and generation of PDAC-specific adenosine**  
372 **signature**



373 In order to evaluate the correlation of the adenosine-related gene expression in  
374 correlation to human PDAC we analysed 712 genes which had at least a 50% decrease (Log2FC  
375  $<-0.58$ ) following adenosine inhibition treatment, of which 561 had a human ortholog (suppl.  
376 table 2-3).

377 For the analysis of the adenosine-related gene expression in Bailey (39) PDAC subtypes we  
378 derived z-score of the 517 genes analysed in the dataset (out of the 561 genes) for the 97  
379 patients with RNAseq data and subtypes information (<https://www.cbioportal.org/>). The z-  
380 score of all genes were summed up per each patient and the total number represented as the  
381 adenosine pathway gene score as previously shown (15) and in supplementary materials and  
382 methods.

383 For the generation of a PDAC-specific adenosine signature and application of this to PDAC  
384 survival, from the list of 561 human ortholog genes, we manually curated the ones related  
385 without ambiguity to the major biological processes implicated in PDAC pathogenesis and  
386 indicated by pathway analysis (hypoxia, immunity and extracellular matrix organisation). Of  
387 these genes, only those correlated positively or negatively to survival in PDAC  
388 (<https://kmplot.com>) and significantly co-expressed with CD73 and/or Adora2a in public  
389 datasets (Bailey et al. or TCGA) were selected. A final list of 52 genes was analysed (suppl.  
390 table 6).

391 Using PDAC specific data from TCGA (40) available in <https://www.cbioportal.org/>, we  
392 derived the z-score of these 52 genes for each patient with known disease-specific-survival  
393 (DSS), Progression free survival (PFS) and disease-free-survival (DFS). The z-scores for all  
394 genes were summed up for each patient and was deemed high adenosine score if  $>0$  or low  
395 adenosine score if  $<0$ , as previously shown (15).

## 396 **Statistics**

397 Graphpad Prism v.8 was used for statistical analyses. Analysis and comparisons of two  
398 groups was performed with two-tailed unpaired Student's T-test when assuming Gaussian  
399 distribution or Mann Whitney test. Analysis of three or more groups was performed with one-  
400 way Anova with Tukey's multiple comparisons post-test analysis unless otherwise specified.  
401 Kaplan-Meier analysis with log-rank Mantel-Cox test was used to evaluate difference in  
402 survivals. Differences were considered significant when  $p < 0.05$ .

### 403 **Data Availability Statement**

404 The data generated in this study are available within the article and its supplementary data files  
405 or from the corresponding authors upon reasonable request. Code for differential expression  
406 analysis and visualisation of RNAseq data is available via Github [https://github.com/ka-](https://github.com/ka-lw/AdenoPDAC)  
407 [lw/AdenoPDAC](https://github.com/ka-lw/AdenoPDAC) .

## 408 **Results**

### 409 **Adenosine pathway expression on KPCY-derived cell lines**

410 Human PDAC cells have been shown to be strongly positive for CD73 expression and have  
411 a sensitivity, although weak, to the targeting of CD73 in vitro (34). For this reason, we sought  
412 to investigate whether murine KPCY-derived cell lines (which are associated with contrasting  
413 ability to generate IOT- resistant or responsive tumours when re-implanted in syngeneic mice)  
414 express the proteins of the canonical adenosine pathway (CD39, CD73 and Adora2a). We  
415 found that, as in human cells, mouse PDAC cell lines express high levels of CD73 (from 72%  
416 to 99% of cells; fig. 1A and suppl. fig. 2A) while having negligible or no expression of CD39  
417 and Adora2a (suppl. fig. 2B-C). Exposing the cells to an anti-CD73 antibody (2c5mIgG1)  
418 reduced significantly the detection of CD73 in all the cells after only 24-hour treatment ( $p < 0.05$   
419 in all cell lines, fig. 1B), but this did not translate into inhibition of cell growth after short or  
420 long exposure at high concentrations. Indeed, confluency experiments showed that the

421 treatment did not affect the proliferation of any of the cell lines over a period of 72 hours (fig.  
422 1C and suppl. fig. 2D-E), and colony-forming experiments performed on 2838c3 (IOT-  
423 responsive) and 6419c5 (IOT-resistant) clearly demonstrated no differences in terms of number  
424 or size of the colonies formed after 8 days of continuous treatment (fig. 1D and suppl. fig. 2F).  
425 In order to evaluate whether a direct effect of anti-CD73 exposure affects cell proliferation,  
426 reducing adenosine formation, we cultured KPCY-derived cell lines with increasing  
427 concentrations of AMP and 5'-N-(Ethylcarboxamido)adenosine (NECA, a stable form of  
428 adenosine). We were able to demonstrate that adenosine and AMP have no effect on the  
429 proliferation capacity of these cell lines (suppl. fig. 2G-H), corroborating the hypothesis of a  
430 non-cancer cell direct effect of anti-CD73 therapy.

#### 431 **Comparison between KPCY-derived cell lines allograft and KPC autochthonous tumours**

432 Despite the lack of activity in our cell line experiments, preliminary reports from clinical  
433 trials suggest activity in patients with PDAC treated, with anti-CD73 antibody (Oleclumab)  
434 (41). As we hypothesised that this might be the result of impact on the tumour  
435 microenvironment (TME), we investigated the expression of this pathway on the tumour-  
436 infiltrating immune cells for different murine PDAC models, including KPCY-derived cell  
437 lines allografts (with differential response to IOT) and autochthonous KPC tumours. In order  
438 to understand the complexity and similarities of the immune system in these models we first  
439 compared the immune infiltration of the cell line allografts to the KPC model.

440 The immunosuppressive characteristics identified in autochthonous KPC tumours, appear  
441 to be more aligned with those of the IOT-resistant model. In particular regarding lymphocyte  
442 populations, KPC tumours are usually infiltrated by a low number of CD8<sup>+</sup> T cells (mean out  
443 of CD45<sup>+</sup> cells 2838c3 6.9%, 6419c5 0.9% and KPC 1.9%) which bear fewer features of  
444 activation/exhaustion (mean 70% vs 13% vs 10%) as shown in suppl. figure 3A and have a

445 similar regulatory T-cells (Tregs) infiltration (mean 3,2% vs 1% vs 0.7%, suppl. fig 3B) to  
446 IOT-resistant tumours. Moreover, KPC tumours showed greater heterogeneity regarding  
447 myeloid infiltrating populations (suppl. fig 3D-H) and are characterised by high M2/M1 (mean  
448 11,3 vs 33,7 vs 24,8, suppl. fig. 3E) and CD11b<sup>+</sup>/CD11b<sup>-</sup> dendritic cells (mean 1,3 vs 3,2 vs  
449 4,8; suppl. fig. 3F) ratios, which are linked to an immunosuppressive and tolerogenic  
450 functionality of the TME respectively (42,43), and again this recapitulated partially the  
451 phenotype of the IOT-resistant model. Other populations such as CD4<sup>+</sup> T-cells, mo-MDSCs  
452 and g-MDSCs (suppl. fig. 3C, G and H) further demonstrated the diversity among KPC lesions.  
453 Taken together these results highlight that our IOT- resistant and responsive models stand out  
454 as the extreme clonotypes which can arise from a complex and heterogeneous biology which  
455 are represented in KPC autochthonous tumours.

#### 456 **The adenosine pathway is enriched in immune cells infiltrating PDAC models**

457 We hypothesized that the adenosine pathway might have a more impactful role in the  
458 TME, as opposed to a cell autonomous effect. For this reason, we investigated the expression  
459 of the adenosine pathway components on tumour-infiltrating immune cells which represent  
460 significant proportion cells seen in PDAC lesions. We showed a highly significant enrichment  
461 in both the IOT-resistant and IOT-responsive models for CD39<sup>+</sup>CD73<sup>+</sup> double-expressing  
462 immune cells, when compared to secondary lymphoid organs (spleen and nodes). In particular,  
463 the majority (65-91% in tumour vs 36-56% in spleen) of tumour-infiltrating CD11b<sup>+</sup> myeloid  
464 cells express the two receptors, due to an increase in expression of CD73, given that those cells  
465 are normally CD39<sup>+</sup> (fig. 2A-B). Similar results were shown for Tregs and CD8<sup>+</sup> T-cells,  
466 which are normally CD73<sup>+</sup> and displayed an increase in expression of CD39 in tumour,  
467 compared to the secondary lymphoid organs counterparts (suppl. fig. 4A; p<0.05). There was  
468 no significant difference in these findings when comparing the two models, despite their  
469 differential response to IOT. We then confirmed these findings in KPC autochthonous tumours

470 and found similar results, with a significant increase of CD39-CD73 double expressing CD11b<sup>+</sup>  
471 myeloid cells infiltrating the tumours compared to spleens (avg 77% vs 36% p<0.0001, fig.  
472 2C-D), harvested from the same mice. Of note, 4 KPC mice had synchronous metastases (3  
473 liver and 1 spleen), and in 3 of these, myeloid cells infiltrating the metastases were also  
474 enriched for CD73<sup>+</sup>CD39<sup>+</sup> double expression (suppl. fig. 4 C) when compared to secondary  
475 lymphoid organs. A significant augmented co-expression was also observed for Tregs and  
476 CD8<sup>+</sup> T-cells in KPC tumours when compared to mesenteric or inguinal lymph nodes (suppl.  
477 fig. 4B). An increased percentage of CD39/CD73 double expressing CD8 T-cells and Tregs  
478 was noted in the spleens (suppl. fig. 4B) if compared to what we found in non-tumour bearing  
479 mice (not shown) or s.c. tumour bearing mice, suggesting trafficking of immune lymphoid  
480 populations between primary lesions and closer lymphoid organs.

#### 481 **Adenosine distributes primarily in the areas surrounding necrosis**

482 Given the enrichment of the adenosine pathway in the TME of PDAC models, we  
483 anticipated that extracellular adenosine might have been abundant in the tumour  
484 microenvironment. Using Mass Spectrometry Imaging we evaluated the presence and the  
485 distribution of the purinergic system in the TME of IOT-resistant tumour. The tissue  
486 classification and segmentation approaches were driven by tissue-defining metabolic pattern.  
487 Areas characterised by a high energetic state defined by a high abundance of ATP and ADP  
488 and a low abundance of depleted high energy phosphates such as AMP, were called *viable*  
489 *tumour*. On the other hand necrotic and necrosis adjacent areas of the tissues, characterised by  
490 high abundances of lactate, products of ribonucleotide catabolism (i.e. xanthine and  
491 hypoxanthine) and other metabolites associated with tissue hypoxia and an overall energy-  
492 deprived state, were termed *necrotic margin* (fig. 3A-B). We found that adenosine is highly  
493 expressed in the microenvironment of IOT-resistant tumour, although showing a heterogenous  
494 distribution, with high abundance in the necrotic margin areas (fig. 3A,C). When we

495 investigated cell population distribution in the different areas using Image Mass Cytometry we  
496 noted that in the necrotic margin areas there was a massive increase in the number of infiltrating  
497 CD11b<sup>+</sup> myeloid cells, that led to a significant decrease of the ratio between cancer  
498 cells/myeloid cells (fig. 3D). This again suggests that myeloid cells have an instrumental role  
499 in the generation of adenosine in this aggressive model of PDAC.

#### 500 **Expression of Adora2a receptor on myeloid subpopulations of pancreatic cancer models**

501 Having shown in these models that in the PDAC microenvironment, immunosuppressive  
502 adenosine is present abundantly, we then investigated which cells within the microenvironment  
503 might be responsive to this. We investigated the expression of the adenosine A2a receptor  
504 (Adora2a, the receptor with the highest affinity for adenosine) that has been found frequently  
505 overexpressed in human tumours. We found that Adora2a was highly expressed by tumour-  
506 infiltrating myeloid population when compared to the spleen (suppl. fig. 3D-E) and this  
507 expression was significantly higher in the IOT-resistant model in term of MFI (10000 vs 6700,  
508  $p < 0.0001$ ) and % of Adora2a<sup>+</sup> myeloid cells (15% vs 11%,  $p = 0.001$ ). When comparing  
509 different subpopulations, pro-tumorigenic M2 macrophages, infiltrating both IOT-resistant and  
510 IOT-responsive PDAC showed high positivity for the receptor. The IOT-resistant model had  
511 higher expression of Adora2a compared to the IOT-responsive model (fig. 3E-F;  $p < 0.0001$ )  
512 and percentage of Adora2a<sup>+</sup> M2 positivity [72% vs 43%;  $p < 0.0001$ ] (fig. 3I)]. Once more, the  
513 results were confirmed in KPC tumours where Adora2a was found to be increased in  
514 M2 macrophages infiltrating the lesions when compared to matched spleens (fig. 3G-H). The  
515 KPC model demonstrated once again the heterogeneity of pancreatic lesions, which in terms  
516 of M2 macrophages positive for Adora2a receptor, covers the entire range of expression seen  
517 in the two subcutaneous models used (fig. 3I). Notably, of three KPCs where metastatic nodules  
518 were found, Adora2a expression was found retained in the M2 macrophages infiltrating the  
519 secondary lesions (suppl. fig. 4F).

520 In addition to pro-tumorigenic macrophages, Adora2a expression was found enriched in  
521 other myeloid immune populations infiltrating the tumours. In particular CD11b<sup>-</sup> dendritic  
522 cells, CD11b<sup>+</sup> dendritic cells (suppl. fig. 4G), M1 macrophages (suppl. fig. 4H) and mo-  
523 MDSCs (suppl. fig. 4I) express significantly higher Adora2a amount when compared to  
524 matched spleens in both models. This expression differs significantly between IOT- responsive  
525 and resistant models in CD11b<sup>+</sup> dendritic cells (mean MFI 2075 ± 174 vs 3187 ± 636  
526 respectively; p=0.007), M1 macrophages (4521 ± 983 vs 6943 ± 1690; p=0.02) and mo-MDSCs  
527 (1894 ± 479 vs 6112 ± 1870; p=0.001) (suppl. fig. 4G-I).

528 **Targeting adenosine pathway reshapes immune infiltration and delay tumour growth of**  
529 **pancreatic cancer IOT-resistant model and represents a combinational therapeutic**  
530 **opportunity**

531 Our data suggest a mechanism by which the myeloid population contributes to the pro-  
532 tumorigenic functionality of the pancreatic cancer microenvironment, where eAdo generated  
533 by myeloid population and cancer cells would target and stimulate further the myeloid  
534 subpopulations, in particular the pro-tumorigenic M2 macrophages. Therefore, we inhibited  
535 *in vivo* eAdo formation and function, using an antibody against CD73 (2c5mIgG1) and a small  
536 molecule inhibitor of Adora2a (AZD4635), a combination (Adoi) which would maximise the  
537 inhibition of the axis. The 14-day treatment was started after the microenvironment was  
538 allowed to establish (12-14 days after implantation) in the IOT-resistant allografts (fig 4A).  
539 The anti-CD73 was extremely effective in reducing the expression of CD73 on the surface of  
540 all live cells (suppl. fig. 5A). Again, MSI data showed that the treatment was very effective in  
541 reducing adenosine formation in the TME (Fig. 4 B-C). In particular, adenosine was  
542 completely abolished in the viable tumour areas, while a small amount remained in the necrotic  
543 margins, although massively decreased (fig. 4C), highlighting the importance to inhibit not  
544 only the formation of adenosine through CD73 inhibition, but also targeting adenosine

545 receptors. The efficiency of the treatment on the extracellular purinergic pathway was also  
546 supported by the decrease of molecules downstream adenosine (adenine and inosine in viable  
547 tumour and necrotic margin areas), and the increase of upstream and alternative pathway  
548 molecules as AMP (in the necrotic margin) and xanthine (in both viable tumour and necrotic  
549 margin) respectively. There was no change in the distribution of ATP, ADP and hypoxanthine  
550 (suppl. fig 5B).

551 The treatment led to a significant reduction of growth rate and tumour weight (fig 4D and  
552 suppl. fig. 6A). The adenosine pathway has been shown to control the metastatic process and  
553 several authors have shown that inhibiting this axis can reduce the metastatic burden in mice  
554 models (44,45). For the first time here however, we were able to show that blocking adenosine  
555 generation and function can significantly reduce the occurrence of spontaneous metastasis. The  
556 6419c5 s.c. model spontaneously develops lung metastases in 100% of the mice and blocking  
557 adenosine strongly reduce the metastatic burden (median of % mets/lung area 2.6% vs 0.77%;  
558  $p=0.016$ ; fig. 4E).

559 These data suggest that targeting myeloid related, extracellular adenosine formation and  
560 function would have an effect on tumour growth making this approach a candidate for  
561 combinational therapeutic studies. Indeed, when combined with cytotoxic treatment  
562 (AZD6738 and gemcitabine; fig. 4F) or IOT (anti-CD40 agonist, anti-PD-L1 and anti-CTLA4  
563 (FCP); fig. 4I), the adenosine modulation reduced further the tumour growth rate of the  
564 aggressive IOT-resistant 6419c5 tumour model. AZD6738/gemcitabine alone was confirmed  
565 to be able to significantly slow the growth of the IOT-resistant model (2/7 stable disease, SD  
566 [28.5%]), but the addition of the adenosine blocking led to a further stabilization of the tumour  
567 growth in a 2-week regimen ( $p=0.003$  vs AZD6738/gem alone; 4/7 SD [57.1%]; fig. 4G). To  
568 assess whether the combination had an effect on the immune infiltration of the TME we looked  
569 at IHC staining for CD8 and Foxp3 and showed that the quadruple combination almost tripled



570 the ratio CD8/Tregs (median 0.70 vs 0.25 of vehicles + isotype group;  $p=0.04$ ; fig. 4H). The  
571 combo in fact produced a synergistic increase of CD8 infiltration (median 4.5 cells/mm<sup>2</sup> vs 2.7  
572 of the control group, 3.9 of AZD6738/gem and 2.8 of AZD4635/ $\alpha$ CD73) and reduction of  
573 Foxp3 infiltration (median 6.5 cells/mm<sup>2</sup> vs 8.1 of the control group, 9.3 of AZD6738/gem and  
574 7.2 of AZD4635/ $\alpha$ CD73) (suppl. fig. 6B-C-)

575 Similarly, combining adenosine blocking and FCP reduced significantly tumour growth  
576 when compared to control (65% tumour growth reduction;  $p=0.002$ ) and FCP (35% tumour  
577 growth reduction;  $p=0.021$ ) arms (fig. 4I-J) further increasing the tumour-infiltrating  
578 CD8/Tregs ratio induced by FPC treatment (ratio means control 0.28 vs FCP/Adoi 6.10  
579  $p=0.008$ ; fig. 4K). Data from two separate experiments with the same controls, showed that  
580 adding Adoi to FPC remains the best combination in controlling tumour growth of the IOT-  
581 resistant 6419c5 model in syngeneic mouse (suppl. fig. 6D-F). These data taken together  
582 suggest again that targeting the adenosine pathway in PDAC offers a new strategy which can  
583 be at the crossroad of the modulation of anti-tumour immune response.

584 To understand the role of the adenosine modulation in reprogramming the TME, given the  
585 effect on tumour growth alone or in combination we analysed the changes in immune  
586 infiltration following anti-CD73 and AZD4635 treatment. Flow cytometry analysis showed  
587 that following treatment, tumours were less likely to be infiltrated by M2 macrophages (median  
588 approximately 35000 vs 23000 cells/100mg;  $p=0.002$ ; fig. 5A-B), in particular PD-L1<sup>+</sup> ones  
589 (median 79% vs 65%;  $p=0.002$ ; fig. 5B). IMC analysis revealed that the reduction of M2  
590 macrophages either F4/80<sup>+</sup> CD206<sup>+</sup> (fig. 5C,E) and CD68<sup>+</sup> CD206<sup>+</sup> (fig. 5D-F) cells, was more  
591 prominent in the viable tumour areas. Notably this reduced infiltration is present in areas other  
592 than those where adenosine is abundant, suggesting that adenosine is stimulating the production  
593 of factors affecting recruitment of macrophages in the viable tumour areas. Blocking the axis,  
594 also led to a reduced frequency of Tregs out of CD4<sup>+</sup> T-cells infiltration (mean 42% vs 27%;

595 p=0.03, fig. 5G-H) and a strong reduction of PD-L1 expression for all live cells within the  
596 tumour (p=0.0006), in particular CD45<sup>+</sup> cells (p=0.008) as shown in suppl. fig. 7A. The  
597 expression of PD-L1 however declined for F4/80<sup>+</sup> macrophages (p=0.02) but not for dendritic  
598 cells following treatment (suppl. fig. 7B). Finally, IMC data also confirmed a reduction of total  
599 macrophages in the treated tumours as shown by flow, again more evident in the viable tumour  
600 regions (fig. 5C-D, F4/80 and CD68 panels and suppl. fig 7C). IMC also showed a global  
601 reduction of what we indicated as M1 macrophages (F4/80<sup>+</sup> CD206<sup>-</sup> MHCII<sup>+</sup>) (suppl. fig. 7 D-  
602 E) which was not appreciated in the flow analysis, and a total increase of granzyme B (GrB)  
603 infiltrating cells following treatment (data not shown), in particular CD4<sup>+</sup> GrB<sup>+</sup> cells (suppl.  
604 fig. 7 F-G), the latest also called cytolytic CD4 T-cells, recently associated to the response to  
605 cancer immunotherapy (46). Further studies would further shed light on the relevance of these  
606 results, analysing the contribution of adenosine abundance and spatial distribution to modelling  
607 of tumour infiltration by distinct macrophage subpopulations beyond M1-M2 dichotomy.

608 We next looked at single agent contribution and found that a significant tumour growth  
609 inhibition compared to control was only achieved when the combination of AZD4635 and anti-  
610 CD73 antibody was used (p=0.003; suppl. fig. 7H). Regarding the TME, only the full  
611 combination was able to reduce the M2 macrophage infiltration (p=0.03, suppl. fig I) and the  
612 ratio M2/M1 macrophages (p=0.04; suppl. fig 7J) in the tumour. Further, additive effect of  
613 double inhibition was seen for the reduction of tumour infiltrating Tregs (suppl. fig. 7K).

## 614 **RNA sequencing analysis reveals reprogramming of TME following adenosine** 615 **modulation**

616 The TME of PDAC is an intricate structure that relies on the presence of multiple non-  
617 malignant cells. This TME is well recapitulated in pre-clinical models of PDAC (35). In order  
618 to investigate the broader effect of Adoi in 6419c5 PDAC model, given the effect we have seen

619 in the infiltrating immune suppressive populations, we performed a bulk RNAseq analysis of  
620 the 6419c5 model treated with Adoi or control (5 vs 6 mice, see methods). Following the 14-  
621 day treatment with Adora2a inhibitor and anti-CD73 a total of 712 genes had at least a 50%  
622 decrease (logfold <-0.58; fig. 6A). KEGG and GO Biological process pathway analysis  
623 revealed a profound dependency of the TME on the presence of extracellular adenosine (fig.  
624 6B-C). Genes associated with hypoxia response and vasculogenesis (e.g. Hif1a, Slc2a1,  
625 Hifpda, Adm, Vegfa, Vegfd), immunity and immune suppression (e.g. Cd274, Cd209, Mrc1,  
626 Cd200, Il1a, Il6, Ptgs2) and tumour stroma/ECM organisation (e.g. Col5a3, Col6a3, Itga2,  
627 Mmp13, Mmp3, Mmp9, Ereg, Pthlh) were significantly downregulated by the treatment (fig.  
628 6 C). Of note, several functional and structural genes associated with different subtypes of M2  
629 macrophages (Cd209, Mrc1) were found to be decreased, supporting data from flow and IMC  
630 data analysis. As already indicated by the flow analysis, RNAseq analysis also showed a  
631 significant decrease of the expression of Cd274 (PD-L1) gene, suggesting a strong rationale of  
632 the use of adenosine inhibition as combination for immunotherapy studies involving immune  
633 checkpoint inhibitors. Adenosine signalling pathway expression has previously been associated  
634 with the presence of hypoxia (47,48); here we show for the first time that the presence of  
635 functional extracellular adenosine pathway is responsible for the expression of several genes  
636 related to hypoxia (including Hif1a) in a positive feedback loop.

637 To evaluate the importance of this pathway in the context of human PDAC and  
638 highlight the role in the formation of TME we scored our adenosine-related gene expression  
639 set with the PDAC subtypes published by Bailey (39). Of our 712 genes with a 50% decrease,  
640 561 had a human ortholog and of these the z-scores of 517 genes were summed in each of the  
641 97 patients with RNAseq data in Bailey et al. to obtain a score. We were able to show that the  
642 adenosine-related gene expression is mostly expressed in the aggressive squamous subtype  
643 (fig. 6D), that has been originally associated with a poorer prognosis when compared to others.

644 The score remained significantly higher even when comparing the squamous subtypes with the  
645 grouped non-squamous (fig. 6E).

646 In order to create a PDAC-specific adenosine signature and to evaluate its performance in  
647 PDAC-specific outcomes, we created a signature starting from the 561 human ortholog genes  
648 with a 50% decreased following Ado treatment. Of these, 52 genes were selected for the  
649 signature (fig. 6F), that according to our RNAseq dataset were clearly associated with the  
650 pathway areas dependent on adenosine (hypoxia response, immunity, tumour stroma), were  
651 associated positively or negatively with PDAC prognosis, and were significantly co-expressed  
652 with CD73 and/or Adora2a in the PDAC genome datasets (TCGA or Bailey). Of the 176 and  
653 170 patients with available progression free survival (PFS) and disease-specific survival (DSS)  
654 outcome respectively, we found that the presence of a high adenosine signature is associated  
655 with higher probability of PDAC progression (mPFS high Ado 13.05 vs low Ado 18.25,  
656  $p=0.02$ ; fig. 6G) and a poorer PDAC-specific survival (mDSS high Ado 19.66 vs low Ado *NR*,  
657  $p=0.01$ ; fig. 6H), suggesting again that the presence of a functional adenosine pathway has a  
658 detrimental role in human PDAC. These data should be considered in light of the fact that  
659 patients in TCGA dataset are predominantly non-metastatic, and the presence of the adenosine  
660 signature seems to become relevant for PDAC associated death 20 months after diagnosis.  
661 Notably, the presence of a high adenosine signature is also associated with shorter disease-free-  
662 survival (mDFS high ado 23.54 vs low Ado 49.68,  $p=ns$ ; suppl. fig. 7L).

663 Overall these data highlight the role of the innate immune system in shaping a pro-tumorigenic,  
664 immune suppressive microenvironment in PDAC, dependent on the formation of extracellular  
665 adenosine in the context of a hypoxic milieu. We can speculate that this unfavourable  
666 environment may create the condition for a more aggressive PDAC phenotype which would  
667 then translate in the ability to escape the immune system, resist to cytotoxic treatment and  
668 easily metastasize.

## 669 **Discussion**

670 Pancreatic ductal adenocarcinoma (PDAC) is projected to become the second highest  
671 cause of cancer-related death in the US within 10 years (49), and represents one of the major  
672 unmet needs of cancer treatment. Despite extensive efforts by laboratory and clinical scientists  
673 in the last 50 years, only 1% of patients diagnosed with PDAC today will survive for 10 years  
674 (<https://www.cancerresearchuk.org/health-professional/cancer-statistics-for-the-uk>). The  
675 response rate following standard treatments is poor, usually short-lasting, and associated with  
676 significant treatment related toxicity (1). In the past few years, immunotherapy has provided  
677 new hope in the treatment of several types of cancer, and has dramatically changed the life  
678 expectancy of many patients with metastatic disease (50). However, this has not been true for  
679 patients with PDAC which is associated with a very low response rate to immunotherapy,  
680 usually confined to MSI-H/dMMR tumours, rarely found in this disease (2).

681 The role of the innate immune system in the generation of an immune suppressive/pro-  
682 tumorigenic microenvironment in PDAC is well known. The presence of marked infiltration  
683 of macrophages has been identified as an independent predictive factor of the aggressiveness  
684 and prognosis of PDAC, in patients (23,24). Only recently, three phase I clinical trials in  
685 patients with PDAC have shown that targeting the innate immune system can have impact in  
686 patients with PDAC. A phase I trial published on *Lancet Oncology*, showed that a combination  
687 of anti PD-1 and CD40 agonist, added to gemcitabine and nab-paclitaxel, led to 60% of  
688 response rate, with some durable responses (51). In addition, the inhibition of the  
689 CXCL12/CXCR4 axis has been demonstrated to modify the immunosuppressive TME of  
690 PDAC and CRC patients (52,53).

691 The extracellular adenosine pathway has also been shown to influence the TME  
692 fostering the immune suppression provided by some innate immune subpopulations (as

693 myeloid and NKs) and inhibiting the function of the adaptive immune system, in particular, T-  
694 cells (6,33,44). By activating its receptors, adenosine is able to increase the intracellular  
695 concentration of cAMP which leads to the induction of a M2 phenotype of macrophages and  
696 block the secretion of IL1 $\beta$  increasing the release of CXCL1, IL-6, IL-10 and IL-8 among  
697 others from myeloid population which are known to orchestrate immune exclusion (8,54).  
698 eAdo also favours the formation and maintenance of Treg cells (8), which are known to favour  
699 cancer progression and IOT resistance .

700 Emerging data correlate the adenosine pathway to the promotion and aggressiveness of PDAC.  
701 CD73 is also overexpressed on the surface of cancer cells of PDAC (34,55), but its role on  
702 cancer cells is controversial, as is the cancer cell direct role of extracellular adenosine. A recent  
703 publication, shows that genomic targeting on mouse PDAC cells of CD73 leads to a reduced  
704 in vivo tumour formation and change in the circulating and infiltrating immune system (57).  
705 Data from bulk RNA-sequencing have determined that CD73 along with Adora2a and Adora2b  
706 are strongly overexpressed in tumours when compared to normal pancreatic tissue (33).  
707 Recently an adenosine signature has been published which clearly identifies enrichment in  
708 PDAC and a correlation with progression free survival as well as overall survival (15).

709 To date, little was known about the expression of the adenosine pathway in the context  
710 of the innate and adaptive immune system in PDAC, how the extracellular adenosine is  
711 generated and what are the targets of adenosine also in regard to its spatial distribution and  
712 formation of adenosine.

713 Our results show for the first time, that the mechanism of generation of extracellular  
714 adenosine in pancreatic cancer TME is finely orchestrated by tumour infiltrating myeloid cells  
715 and tumour cells, due to the expression of high level of CD39 in infiltrating myeloid cells and  
716 CD73 on both cell types. We have also demonstrated that the pathway can be overexpressed

717 in T-cells infiltrating the tumours, regardless of their activation status (fig. 1,2 and suppl. fig.  
718 2,4). The distribution of extracellular adenosine is spatially heterogeneous and a high level of  
719 extracellular adenosine correlates with the presence of a hypoxic environment and is favoured  
720 by the presence of necrosis, where the myeloid population is enriched (fig.3). Necrosis is  
721 common in human PDAC and related to poor prognosis for all stages (56). The enrichment of  
722 a CD39<sup>+</sup> CD73<sup>+</sup> double population, potentially able to independently produce adenosine, does  
723 not seem to correlate with IOT- resistant or responsive tumour models, but there is a difference  
724 when the target of adenosine (Adora2a receptor), is considered. Adora2a on myeloid  
725 populations, in particular in pro-tumorigenic M2 macrophages but also in antigen presenting  
726 cells, is differentially expressed in regard of IOT response phenotype, with the resistant  
727 tumours abundantly overexpressing the receptor in these populations (fig.3 and suppl. fig. 4).  
728 The bulk RNAseq analysis of tumour treated with adenosine inhibition revealed indeed a  
729 broader role for adenosine in PDAC TME (fig. 6). Genes related to immunosuppression and  
730 innate immunity recruitment (Cd274, Csf2, Cxcl2, Ccl3, Ccl4, Ccl12, Il1a, Osm, Il6),  
731 angiogenesis (Vegfa, Vegfd, Adm2, Flt1, Pgf, EglN1) and cell-ECM interaction (Adam19,  
732 Adamts14, Adamts4, Adamts5, Col5a3, Col6a, Itga2, Itga7, Mmp3, Mmp9, Mmp12) indicated  
733 the targeting of population of cells responsible for the acquisition of a pro-tumorigenic, pro-  
734 metastatic, pro-fibrotic and immune resistant phenotype. Further, the downregulation of genes  
735 associated with hypoxia (Hif1a, Hif1a, Nos2, Hk1, Hk2, EglN3) following treatment shows  
736 not only that the adenosine pathway is induced during hypoxia (e.g. CD73 and Adora2b), but  
737 that the hypoxia response is also dependent on the presence of the adenosine pathway in what  
738 we can speculate is a positive feedback loop. The inhibition of adenosine led to a reduced  
739 infiltration of M2 macrophages further from the hypoxic regions where adenosine is most  
740 abundant, suggesting that the effect of adenosine is stimulating the secretion of factors that are  
741 recruiting monocytes into the tumour microenvironment, replenishing macrophage infiltration

742 (fig. 5 and suppl. fig. 7). Notably, targeting the pathway can reduce tumour growth in an IOT-  
743 resistant model, improving the response to cytotoxic and immunotherapy combinations (fig. 4  
744 and suppl. fig. 6)

745 Targeting adenosine would represent an alternative strategy to reduce the infiltration of  
746 pro-tumorigenic macrophages in PDAC lesions. One approach has been the administration of  
747 a CSF1R inhibitor (32), which has shown promising pre-clinical data, that have not been  
748 translated in human so far. A recent publication shows that in CRC mouse models, the use of  
749 anti CSF1R treatment spares a subpopulation of macrophages characterised by the expression  
750 of Cd274 (PD-L1), Vegfa, Hlpa, Bhlhe40, Mmp12, Cebpb, Hmox1 among others (28).  
751 Given that all of these genes are among the immune suppressive and vasculogenic molecules  
752 that seem to be strongly downregulated by adenosine inhibition and our data show a reduction  
753 of some subpopulation of PD-L1<sup>+</sup> macrophages, we can speculate that adenosine inhibition  
754 could potentially target these populations of pro-angiogenesis, immune suppressive  
755 macrophages.

756 Information provided by the PDAC specific adenosine signature, indicated that the  
757 adenosine pathway seems to play a peculiar role in progression and survival of human PDAC,  
758 due to the ability of the adenosine inhibition to profoundly reprogram the tumour  
759 microenvironment in PDAC models (fig. 6 and suppl. fig. 7). Gathering more information on  
760 the role of this pathway in human cancers should be a priority, retrospectively evaluating and  
761 then prospectively stratifying the patients on the basis of histopathological/radiological features  
762 and the spatial distribution of adenosine. We could expect that efficiently targeting the  
763 adenosine pathway may potentially be at the crossroads of cytotoxic and immunotherapy  
764 efficacy and the exploration of these strategies is needed in PDAC-specific clinical trials. These  
765 would not only need to be designed to target the generation of adenosine through CD73  
766 inhibition but also adenosine specific receptors.



767 In summary, we have shown that tumour-infiltrating myeloid immune cells contribute  
768 to the generation of extracellular adenosine in the context of PDAC, and that this correlates  
769 with the presence of hypoxia. Macrophages in particular, express high levels of Adora2a  
770 receptor in PDAC models and targeting the adenosine/myeloid axis delays PDAC tumour  
771 growth, improving the efficacy of cytotoxic and immunotherapies. Finally, data from IMC,  
772 flow cytometry and RNAseq suggest that the adenosine pathway is fundamental for the  
773 formation of a pro-tumorigenic, immunosuppressive TME, and its expression is associated  
774 with an aggressive phenotype and poor survival in human PDAC.

775

## 776 **Acknowledgments**

777 All CRUK CI authors received research funding from Cancer Research UK (Nos.  
778 C14303/A17197 and C9545/A29580). The Li Ka Shing Centre where this work was performed  
779 was generously funded by CK Hutchison Holdings Limited, the University of Cambridge,  
780 CRUK, The Atlantic Philanthropies and others. This work was supported by Cancer Research  
781 UK (C9685/A27444) to VG. The authors wish to thank all the CRUK Cambridge Institute core  
782 facilities, in particular Research Instrumentation & Cell Services (RICS), Flow Cytometry,  
783 Histopathology, Biological Resource Unit (BRU), Genomics and Genome editing cores. VG  
784 would like to thank Maïke de la Roche (CRUK Cambridge Institute - University of Cambridge)  
785 and Klaus Okkenhaug (Department of Pathology - University of Cambridge) for helpful  
786 suggestions and advices. This study was also supported by Cancer Research UK Precision  
787 Panc grant C96/A25238. HB holds a PhD studentship at the University of Cambridge which  
788 is supported jointly by the University of Cambridge Experimental Medicine Training Initiative  
789 (EMI) programme in partnership with AstraZeneca (EMI-AZ) and the NIHR Biomedical  
790 Research Centre and SYL is founded by the Cambridge Trust (Cambridge International

791 Scholarship). Work by JT / KW is funded by a core grant award from the MRC  
792 (MC\_UU\_00025/12). The KPCY-derived cell lines were a kind gift of Ben Stanger  
793 (University of Pennsylvania). AZD4635, AZD6738 and the antibodies anti-CD73 (2C5,  
794 murine IgG1-Fc), anti-PD-L1 (AB740080 D265A), NIP228 muIgG1 isotype, NIP228 muIgG1  
795 D265A isotype, were kindly provided by Astrazeneca. The results shown here are in part based  
796 upon data generated by the TCGA Research Network: <https://www.cancer.gov/tcga>.

797

## 798 **Figure legends**

799 **Figure 1. Expression of CD73 on KPCY-derived cell lines and response to anti-CD73 in**  
800 **vitro inhibition.**

801 (A) Representative histogram of CD73 expression on KPCY-derived cell line in flow  
802 cytometry. (B) CD73 expression was evaluated on KPCY-derived cell lines after 24 hours  
803 incubation with 10 µg/ml of anti-CD73 or isotype.

804 (C) 6419c5 (upper) and 2838c3 (lower) cell lines were grown with increasing concentration of  
805 anti-CD73 or isotype (100 µg/ml) and confluency was evaluated using IncuCyte time lapse  
806 imaging for up to 72 hours. For each experiment, 3 different wells per condition were used.

807 (D-E) Representative image (D) and graphs (E) showing survival fraction of cells (2838c3 left,  
808 6419c5 right) from colony-forming experiment following 8-day treatment with anti-CD73 or  
809 isotype. For each experiment, 3 different wells per condition were used.

810 All data are presented as mean ± SEM and were repeated 3 times. Statistical analysis was  
811 performed with two-tailed unpaired Student's t-test (B), mixed-effect model (C) and one-way  
812 Anova with post-test analysis for multiple comparisons; p values are shown in the graphs when  
813 considered significant (p<0.05).

814

815 **Figure 2. The adenosine pathway members are expressed on PDAC-infiltrating immune**  
816 **cells.**

817 (A) Representative flow cytometry plots showing expression of CD39 and CD73 on myeloid  
818 population (left), Tregs (middle) and CD8+ T-cells (right) from KPCY-cell line derived tumour  
819 (upper) and matched spleen (lower) (N= 5 mice per group).

820 (B) Box and whisker graph showing CD39<sup>+</sup>CD73<sup>+</sup> double expression on CD11b<sup>+</sup> cells for  
821 2838c3 and 6419c5 in tumours, matched spleens and tumour draining lymph nodes.

822 (C-D) Representative flow cytometry plots (C) and box and whisker graph (D) showing  
823 CD39<sup>+</sup>CD73<sup>+</sup> double expression on CD11b<sup>+</sup> cells infiltrating autochthonous KPC tumours. All  
824 data are presented as interleaved box and whiskers.

825 Statistical analysis was performed using one-way Anova with post-hoc test analysis for  
826 multiple comparisons (B) and two-tailed unpaired Student's t-test (D); p values are shown in  
827 the graphs when considered significant (p<0.05).

828

829 **Figure 3. Adenosine distribution is spatially heterogeneous and targets myeloid**  
830 **subpopulations.**

831 (A) Mass spectrometry Imaging (MSI) representative images showing adenosine expression  
832 and distribution in PDAC allografts (4 mice per group) at day 21 post-implantation.  
833 Classification was obtained based on metabolites expression and are represented as follows:  
834 viable tumour (red), necrotic margins (blue).

835 (B) Relative tissue composition differences of viable tumour, necrotic margin and necrotic  
836 areas for 6419c5 and 2838c3 allografts at day 21 post-implantation. As shown, necrosis was  
837 present in only one 2838c3 sample at 21 days post-implantation.

838 (C) MSI analysis showing relative abundance (a.u.) of adenosine in the different areas in  
839 6419c5 and 2838c3 at day 21 post-implantation. Bars represent means.

840 (D) The plot (upper left) shows cell density of the ratio cancer cells (PanCK<sup>+</sup>, purple) / myeloid  
841 cells (CD11b<sup>+</sup>, blue) on a Log<sub>2</sub> scaled plot from Imaging Mass cytometry (IMC). The results  
842 of the comparison between the whole area analysed and the other tissue regions are not shown.  
843 N = 6. Asterisks \*\*\*\*, show adjusted p value of <0.0001. The IMC and tissue segmentation  
844 images (upper right and lowers) are from one 6419c5 representative biological replicates at day  
845 28 post-implantation. The tissue segmentation of the IMC image was performed by Random  
846 Forest Classification using all markers analysed. Scale bar on the IMC image is 200 µm.  
847 Segmentation shows viable tumour (green), necrosis (yellow), necrotic margin (blue) and off-  
848 tissue (red).

849 (E-F) Representative plot (E) and summary graph (F) from flow cytometry analysis showing  
850 Adora2a expression on pro-tumorigenic M2 macrophages in allografts (upper) derived from  
851 6419c5 (left) and 2838c3 (right) implantation. Same expression is shown in M2 macrophages  
852 in matched spleens (lower) (8-9 mice per group were used).

853 (G-H) Flow cytometry plot (G) and graph (H) showing expression of Adora2a in M2  
854 macrophages comparing KPC (n=8) autochthonous tumours and matched spleens.

855 (I) Box and whisker plot of the percentage of M2 macrophages positive for Adora2a comparing  
856 two allografts (6419c5 and 2838c3) and KPC tumours.

857 Statistical analysis was performed using one-way Anova with post-hoc test analysis for  
858 multiple comparisons (D,F,I) and two-tailed unpaired Student's t-test (H); p values are shown  
859 in the graphs when considered significant (p<0.05).

860

861 **Figure 4. In vivo modulation of the adenosine pathway reduces tumour growth and**  
862 **metastasis and improves the efficacy of cytotoxics and cancer immunotherapy.**

863 (A) Schedule of adenosine inhibition (Adoi) treatment. Treatment was started following 12-14  
864 days from implantation and continued for 2 weeks. Antibody anti-CD73 (2c5, murine IgG1)

865 was dosed twice per week intraperitoneally at 10 mg/kg. Adora2a inhibitor (AZD4635) was  
866 given by oral gavage twice daily at 50 mg/kg.

867 (B-C) Mass spectrometry Imaging (MSI) representative images (B) and MSI analysis graph  
868 with relative abundance (a.u.) (C) showing adenosine expression and distribution in PDAC  
869 allografts treated with vehicle + isotype or Adoi, at day 14 from treatment start. Classification  
870 was obtained based on metabolites expression and are represented as follows: viable tumour  
871 (green line), necrotic margins (yellow line).

872 (D) Tumour growth ratio (left) and weight (right) of 6419c5 allografts in C57Bl/6 mice treated  
873 with anti-CD73 + AZD4635 (N=16) or vehicles + isotypes (N=15).

874 (E) Representative image (left) and graph (right) showing % of area of the lung analysed  
875 occupied by metastasis (met/lung areas x 100) in vehicle + isotype (N=12) and anti-  
876 CD73+AZD4635 (N=13), evaluated for the presence of spontaneous occurrence of lung  
877 metastases. Every plot represents a single mouse. Tissues were stained with an anti-p53  
878 antibody to highlight the presence of cancer cells. A group of more than 5 p53-positive cells  
879 was counted as metastasis.

880 (F) Schedule (left) and tumour growth ratio (right) of 6419c5 tumour allografts treated as  
881 following (N=7 mice per group): vehicles + isotype, AZD6738 + gemcitabine, anti-CD73 +  
882 AZD4635, AZD6738 + gemcitabine + anti-CD73 + AZD4635. (G) Percentage change in the  
883 long diameter length following 14 days of treatment per group. Number of mice with stable  
884 disease (SD, <20% increase and <30% decrease) are shown at the bottom.

885 (H) Immunohistochemistry analysis following treatment in F showing ratio of CD8<sup>+</sup>/Foxp3<sup>+</sup>  
886 cells.

887 (I) Schedule (left) and tumour growth ratio (right) of 6419c5 tumour allografts treated as  
888 following (N=5 mice per group): vehicle + isotypes, FCP (anti-CD40 agonist, anti-CTLA4,  
889 anti PD-L1), anti-CD73 + AZD4635 (Adoi), FPCAdoi.

890 (J) Percentage change in the long diameter length following 14 days of treatment per group.  
891 Number of mice with stable disease (SD, <20% increase and <30% decrease) are shown at the  
892 bottom.

893 (K) Immunohistochemistry analysis following treatment in I showing ratio of CD8<sup>+</sup>/Foxp3<sup>+</sup>  
894 cells. All data are presented as mean ± SEM. Statistical analysis was performed using Mann-  
895 Whitney test (D-E), mixed-effect model (F-I) and one-way Anova with post-hoc test analysis  
896 for multiple comparisons (C,H-K); p values are shown in the graphs when considered  
897 significant (p<0.05).

898

899 **Figure 5. Adenosine inhibition remodels the PDAC tumour microenvironment reducing**  
900 **pro-tumorigenic macrophages and Tregs.**

901 (A) Representative flow cytometry plot showing tumour associated macrophages (TAM)  
902 infiltrating 6419c5 allografts following 14 day of treatment with vehicle + isotype (left panel)  
903 or anti-CD73 + AZD4635 (right panel).

904 (B) M2 macrophage allograft infiltration (left, number of cells/100 mg of tumour) and ( right)  
905 percentage of M2 macrophages positive for PD-L1 (8 and 10 mice per group analysed).

906 (C-D) Representative IMC image of F4/80 and CD206 (C) and CD68 and CD206 (D) positive  
907 cells infiltrating 6419c5 allograft merged (1<sup>st</sup> panel of C and D) or not with segmentation  
908 following Adoi (lower panels) or control (upper). The tissue segmentation of the IMC image  
909 was performed by Random Forest Classification using all markers analysed. Scale bar on the  
910 IMC image is 200 µm. Segmentation shows viable tumour (green), necrosis (yellow), necrotic  
911 margin (blue) and off-tissue (red).

912 (E-F) The bar plot shows cell density (number of cells per mm<sup>2</sup>) of F480<sup>+</sup>CD206<sup>+</sup> cells (E) and  
913 CD68<sup>+</sup>CD206<sup>+</sup> (F) per segment area.

914 (G) Representative flow cytometry plot showing regulatory T-cells (Tregs) infiltrating 6419c5  
915 allografts following 14 day of treatment with vehicle + isotype (left panel) or anti-CD73 +  
916 AZD4635 (right panel).

917 (H) Infiltration of allografts by Tregs (number of cells/100mg of tumour; 8 and 10 mice per  
918 group analysed).

919 All data are represented as box and whisker plots. Statistical analysis was performed using  
920 Mann-Whitney test (B-H) and one-way Anova with post-hoc test analysis for multiple  
921 comparisons (E-F); p values are shown in the graphs when considered significant ( $p < 0.05$ ).

922

923 **Figure 6 RNA sequencing demonstrates a crucial role for the adenosine pathway in the**  
924 **modelling of the TME, and its correlation to human PDAC prognosis.**

925 (A) Volcano plot related to 6419c5 allografts. Gene overexpressed in vehicle + isotype arm are  
926 on the left side (blue dots), and genes overexpressed in the anti-CD73 + AZD4635 arm (Adoi,  
927 orange dots).

928 (B) Enrichment bar plot of significant overexpressed pathways in the vehicle + isotype group  
929 (adenosine high), according to KEGG and GO Biological process.

930 (C) Heatmaps showing genes regulated during treatment (light grey for controls, dark grey for  
931 Adoi) which are part of the significantly different pathways according to KEGG (left) and GO  
932 Biological process (right). Some genes are shown in both heatmaps

933 (D-E) Human ortholog genes with a 50% downregulation following 14 days of Adoi, were  
934 scored using z-score derived from Bailey's subtypes dataset. Genes scores comparing Adex,  
935 immunogenic, squamous and pancreatic progenitor (D) or squamous vs non-squamous (E) are  
936 shown.

937 (F) PDAC-specific gene signature of 52 genes used for analysis of TCGA human PDAC  
938 dataset, related to the main pathways implied (immunity, hypoxia response and tumour  
939 stroma).

940 (G-H) Gene signature applied to PDAC TCGA dataset (G) for progression free survival (176  
941 patients) and (H) disease specific survival (170 patients) Kaplan-Meier. All data are presented  
942 as mean  $\pm$  SEM when applicable.

943 Statistical analysis was performed using one-way Anova with post-hoc test analysis for  
944 multiple comparisons (D), two-tailed unpaired Student's t-test (E) and log-rank Mantel-Cox  
945 test to evaluate difference in survivals (G-H); p values are shown in the graphs when considered  
946 significant ( $p < 0.05$ ).

947

948

## 949 **References**

950 Cancer Research UK, [https://www.cancerresearchuk.org/health-professional/cancer-](https://www.cancerresearchuk.org/health-professional/cancer-statistics/statistics-by-cancer-type/pancreatic-cancer)  
951 [statistics/statistics-by-cancer-type/pancreatic-cancer](https://www.cancerresearchuk.org/health-professional/cancer-statistics/statistics-by-cancer-type/pancreatic-cancer), Accessed March 2022

952

953 1. Conroy T, Desseigne F, Ychou M, Bouche O, Guimbaud R, Becouarn Y, *et al.* FOLFIRINOX versus  
954 gemcitabine for metastatic pancreatic cancer. *N Engl J Med* **2011**;364(19):1817-25 doi  
955 10.1056/NEJMoa1011923.

956 2. Le DT, Durham JN, Smith KN, Wang H, Bartlett BR, Aulakh LK, *et al.* Mismatch repair deficiency  
957 predicts response of solid tumors to PD-1 blockade. *Science* **2017**;357(6349):409-13 doi  
958 10.1126/science.aan6733.

959 3. Hu ZI, Shia J, Stadler ZK, Varghese AM, Capanu M, Salo-Mullen E, *et al.* Evaluating Mismatch  
960 Repair Deficiency in Pancreatic Adenocarcinoma: Challenges and Recommendations. *Clin*  
961 *Cancer Res* **2018**;24(6):1326-36 doi 10.1158/1078-0432.CCR-17-3099.

962 4. Balachandran VP, Luksza M, Zhao JN, Makarov V, Moral JA, Remark R, *et al.* Identification of  
963 unique neoantigen qualities in long-term survivors of pancreatic cancer. *Nature*  
964 **2017**;551(7681):512-6 doi 10.1038/nature24462.

965 5. Ho WJ, Jaffee EM, Zheng L. The tumour microenvironment in pancreatic cancer - clinical  
966 challenges and opportunities. *Nat Rev Clin Oncol* **2020**;17(9):527-40 doi 10.1038/s41571-020-  
967 0363-5.

968 6. Antonioli L, Blandizzi C, Pacher P, Hasko G. Immunity, inflammation and cancer: a leading role  
969 for adenosine. *Nat Rev Cancer* **2013**;13(12):842-57 doi 10.1038/nrc3613.



- 970 7. Augustin RC, Leone RD, Naing A, Fong L, Bao R, Luke JJ. Next steps for clinical translation of  
971 adenosine pathway inhibition in cancer immunotherapy. *J Immunother Cancer* **2022**;10(2) doi  
972 10.1136/jitc-2021-004089.
- 973 8. Cekic C, Linden J. Purinergic regulation of the immune system. *Nat Rev Immunol*  
974 **2016**;16(3):177-92 doi 10.1038/nri.2016.4.
- 975 9. Goodwin KJ, Gangl E, Sarkar U, Pop-Damkov P, Jones N, Borodovsky A, *et al.* Development of  
976 a quantification method for adenosine in tumors by LC-MS/MS with dansyl chloride  
977 derivatization. *Anal Biochem* **2019**;568:78-88 doi 10.1016/j.ab.2018.11.004.
- 978 10. Duhon T, Duhon R, Montler R, Moses J, Moudgil T, de Miranda NF, *et al.* Co-expression of CD39  
979 and CD103 identifies tumor-reactive CD8 T cells in human solid tumors. *Nat Commun*  
980 **2018**;9(1):2724 doi 10.1038/s41467-018-05072-0.
- 981 11. Simoni Y, Becht E, Fehlings M, Loh CY, Koo SL, Teng KWW, *et al.* Bystander CD8(+) T cells are  
982 abundant and phenotypically distinct in human tumour infiltrates. *Nature*  
983 **2018**;557(7706):575-9 doi 10.1038/s41586-018-0130-2.
- 984 12. Ott M, Tomaszowski KH, Marisetty A, Kong LY, Wei J, Duna M, *et al.* Profiling of patients with  
985 glioma reveals the dominant immunosuppressive axis is refractory to immune function  
986 restoration. *JCI Insight* **2020**;5(17) doi 10.1172/jci.insight.134386.
- 987 13. Takenaka MC, Gabriely G, Rothhammer V, Mascanfroni ID, Wheeler MA, Chao CC, *et al.*  
988 Control of tumor-associated macrophages and T cells in glioblastoma via AHR and CD39. *Nat*  
989 *Neurosci* **2019**;22(5):729-40 doi 10.1038/s41593-019-0370-y.
- 990 14. Goswami S, Walle T, Cornish AE, Basu S, Anandhan S, Fernandez I, *et al.* Immune profiling of  
991 human tumors identifies CD73 as a combinatorial target in glioblastoma. *Nat Med*  
992 **2020**;26(1):39-46 doi 10.1038/s41591-019-0694-x.
- 993 15. Sidders B, Zhang P, Goodwin K, O'Connor G, Russell DL, Borodovsky A, *et al.* Adenosine  
994 Signaling Is Prognostic for Cancer Outcome and Has Predictive Utility for Immunotherapeutic  
995 Response. *Clin Cancer Res* **2020**;26(9):2176-87 doi 10.1158/1078-0432.CCR-19-2183.
- 996 16. Cekic C, Day YJ, Sag D, Linden J. Myeloid expression of adenosine A2A receptor suppresses T  
997 and NK cell responses in the solid tumor microenvironment. *Cancer Res* **2014**;74(24):7250-9  
998 doi 10.1158/0008-5472.CAN-13-3583.
- 999 17. Sorrentino C, Miele L, Porta A, Pinto A, Morello S. Myeloid-derived suppressor cells contribute  
1000 to A2B adenosine receptor-induced VEGF production and angiogenesis in a mouse melanoma  
1001 model. *Oncotarget* **2015**;6(29):27478-89 doi 10.18632/oncotarget.4393.
- 1002 18. Li L, Huang L, Ye H, Song SP, Bajwa A, Lee SJ, *et al.* Dendritic cells tolerized with adenosine  
1003 A(2)AR agonist attenuate acute kidney injury. *J Clin Invest* **2012**;122(11):3931-42 doi  
1004 10.1172/JCI63170.
- 1005 19. Borodovsky A, Barbon CM, Wang Y, Ye M, Prickett L, Chandra D, *et al.* Small molecule AZD4635  
1006 inhibitor of A2AR signaling rescues immune cell function including CD103(+) dendritic cells  
1007 enhancing anti-tumor immunity. *J Immunother Cancer* **2020**;8(2) doi 10.1136/jitc-2019-  
1008 000417.
- 1009 20. Wilson JM, Kurtz CC, Black SG, Ross WG, Alam MS, Linden J, *et al.* The A2B adenosine receptor  
1010 promotes Th17 differentiation via stimulation of dendritic cell IL-6. *J Immunol*  
1011 **2011**;186(12):6746-52 doi 10.4049/jimmunol.1100117.
- 1012 21. Romio M, Reinbeck B, Bongardt S, Huls S, Burghoff S, Schrader J. Extracellular purine  
1013 metabolism and signaling of CD73-derived adenosine in murine Treg and T<sub>H</sub>17 cells. *Am J*  
1014 *Physiol Cell Physiol* **2011**;301(2):C530-9 doi 10.1152/ajpcell.00385.2010.
- 1015 22. Cekic C, Linden J. Adenosine A2A receptors intrinsically regulate CD8+ T cells in the tumor  
1016 microenvironment. *Cancer Res* **2014**;74(24):7239-49 doi 10.1158/0008-5472.CAN-13-3581.
- 1017 23. Ino Y, Yamazaki-Itoh R, Shimada K, Iwasaki M, Kosuge T, Kanai Y, *et al.* Immune cell infiltration  
1018 as an indicator of the immune microenvironment of pancreatic cancer. *Br J Cancer*  
1019 **2013**;108(4):914-23 doi 10.1038/bjc.2013.32.

- 1020 24. Steele NG, Carpenter ES, Kemp SB, Sirihorachai V, The S, Delrosario L, *et al.* Multimodal  
1021 Mapping of the Tumor and Peripheral Blood Immune Landscape in Human Pancreatic Cancer.  
1022 *Nat Cancer* **2020**;1(11):1097-112 doi 10.1038/s43018-020-00121-4.
- 1023 25. Zhang Y, Velez-Delgado A, Mathew E, Li D, Mendez FM, Flannagan K, *et al.* Myeloid cells are  
1024 required for PD-1/PD-L1 checkpoint activation and the establishment of an  
1025 immunosuppressive environment in pancreatic cancer. *Gut* **2017**;66(1):124-36 doi  
1026 10.1136/gutjnl-2016-312078.
- 1027 26. Raghavan S, Winter PS, Navia AW, Williams HL, DenAdel A, Lowder KE, *et al.*  
1028 Microenvironment drives cell state, plasticity, and drug response in pancreatic cancer. *Cell*  
1029 **2021**;184(25):6119-37 e26 doi 10.1016/j.cell.2021.11.017.
- 1030 27. Zhu Y, Herndon JM, Sojka DK, Kim KW, Knolhoff BL, Zuo C, *et al.* Tissue-Resident Macrophages  
1031 in Pancreatic Ductal Adenocarcinoma Originate from Embryonic Hematopoiesis and Promote  
1032 Tumor Progression. *Immunity* **2017**;47(3):597 doi 10.1016/j.immuni.2017.08.018.
- 1033 28. Zhang L, Li Z, Skrzypczynska KM, Fang Q, Zhang W, O'Brien SA, *et al.* Single-Cell Analyses Inform  
1034 Mechanisms of Myeloid-Targeted Therapies in Colon Cancer. *Cell* **2020**;181(2):442-59 e29 doi  
1035 10.1016/j.cell.2020.03.048.
- 1036 29. Beatty GL, Winograd R, Evans RA, Long KB, Luque SL, Lee JW, *et al.* Exclusion of T Cells From  
1037 Pancreatic Carcinomas in Mice Is Regulated by Ly6C(low) F4/80(+) Extratumoral Macrophages.  
1038 *Gastroenterology* **2015**;149(1):201-10 doi 10.1053/j.gastro.2015.04.010.
- 1039 30. Ruffell B, Chang-Strachan D, Chan V, Rosenbusch A, Ho CM, Pryer N, *et al.* Macrophage IL-10  
1040 blocks CD8+ T cell-dependent responses to chemotherapy by suppressing IL-12 expression in  
1041 intratumoral dendritic cells. *Cancer Cell* **2014**;26(5):623-37 doi 10.1016/j.ccell.2014.09.006.
- 1042 31. Daley D, Mani VR, Mohan N, Akkad N, Pandian G, Savadkar S, *et al.* NLRP3 signaling drives  
1043 macrophage-induced adaptive immune suppression in pancreatic carcinoma. *J Exp Med*  
1044 **2017**;214(6):1711-24 doi 10.1084/jem.20161707.
- 1045 32. Candido JB, Morton JP, Bailey P, Campbell AD, Karim SA, Jamieson T, *et al.* CSF1R(+)  
1046 Macrophages Sustain Pancreatic Tumor Growth through T Cell Suppression and Maintenance  
1047 of Key Gene Programs that Define the Squamous Subtype. *Cell Rep* **2018**;23(5):1448-60 doi  
1048 10.1016/j.celrep.2018.03.131.
- 1049 33. Allard B, Allard D, Buisseret L, Stagg J. The adenosine pathway in immuno-oncology. *Nat Rev*  
1050 *Clin Oncol* **2020**;17(10):611-29 doi 10.1038/s41571-020-0382-2.
- 1051 34. Zhou L, Jia S, Chen Y, Wang W, Wu Z, Yu W, *et al.* The distinct role of CD73 in the progression  
1052 of pancreatic cancer. *J Mol Med (Berl)* **2019**;97(6):803-15 doi 10.1007/s00109-018-01742-0.
- 1053 35. Li J, Byrne KT, Yan F, Yamazoe T, Chen Z, Baslan T, *et al.* Tumor Cell-Intrinsic Factors Underlie  
1054 Heterogeneity of Immune Cell Infiltration and Response to Immunotherapy. *Immunity*  
1055 **2018**;49(1):178-93 e7 doi 10.1016/j.immuni.2018.06.006.
- 1056 36. Dannhorn A, Kazanc E, Ling S, Nikula C, Karali E, Serra MP, *et al.* Universal Sample Preparation  
1057 Unlocking Multimodal Molecular Tissue Imaging. *Anal Chem* **2020**;92(16):11080-8 doi  
1058 10.1021/acs.analchem.0c00826.
- 1059 37. Adusumilli R, Mallick P. Data Conversion with ProteoWizard msConvert. *Methods Mol Biol*  
1060 **2017**;1550:339-68 doi 10.1007/978-1-4939-6747-6\_23.
- 1061 38. Race AM, Styles IB, Bunch J. Inclusive sharing of mass spectrometry imaging data requires a  
1062 converter for all. *J Proteomics* **2012**;75(16):5111-2 doi 10.1016/j.jprot.2012.05.035.
- 1063 39. Bailey P, Chang DK, Nones K, Johns AL, Patch AM, Gingras MC, *et al.* Genomic analyses identify  
1064 molecular subtypes of pancreatic cancer. *Nature* **2016**;531(7592):47-52 doi  
1065 10.1038/nature16965.
- 1066 40. Liu J, Lichtenberg T, Hoadley KA, Poisson LM, Lazar AJ, Cherniack AD, *et al.* An Integrated TCGA  
1067 Pan-Cancer Clinical Data Resource to Drive High-Quality Survival Outcome Analytics. *Cell*  
1068 **2018**;173(2):400-16 e11 doi 10.1016/j.cell.2018.02.052.
- 1069 41. Overman MJ, LoRusso P, Strickler JH, Patel SP, Clarke SJ, Noonan AM, *et al.* Safety, efficacy  
1070 and pharmacodynamics (PD) of MEDI9447 (oleclumab) alone or in combination with

- 1071 durvalumab in advanced colorectal cancer (CRC) or pancreatic cancer (panc). *Journal of*  
1072 *Clinical Oncology* **2018**;36(15\_suppl):4123- doi 10.1200/JCO.2018.36.15\_suppl.4123.
- 1073 42. Poh AR, Ernst M. Tumor-Associated Macrophages in Pancreatic Ductal Adenocarcinoma:  
1074 Therapeutic Opportunities and Clinical Challenges. *Cancers (Basel)* **2021**;13(12) doi  
1075 10.3390/cancers13122860.
- 1076 43. Kenkel JA, Tseng WW, Davidson MG, Tolentino LL, Choi O, Bhattacharya N, *et al.* An  
1077 Immunosuppressive Dendritic Cell Subset Accumulates at Secondary Sites and Promotes  
1078 Metastasis in Pancreatic Cancer. *Cancer Res* **2017**;77(15):4158-70 doi 10.1158/0008-  
1079 5472.CAN-16-2212.
- 1080 44. Yan J, Li XY, Roman Aguilera A, Xiao C, Jacobberger-Foissac C, Nowlan B, *et al.* Control of  
1081 Metastases via Myeloid CD39 and NK Cell Effector Function. *Cancer Immunol Res*  
1082 **2020**;8(3):356-67 doi 10.1158/2326-6066.CIR-19-0749.
- 1083 45. Sun X, Wu Y, Gao W, Enjyoji K, Csizmadia E, Muller CE, *et al.* CD39/ENTPD1 expression by  
1084 CD4<sup>+</sup>Foxp3<sup>+</sup> regulatory T cells promotes hepatic metastatic tumor growth in mice.  
1085 *Gastroenterology* **2010**;139(3):1030-40 doi 10.1053/j.gastro.2010.05.007.
- 1086 46. Cachot A, Bilous M, Liu YC, Li X, Saillard M, Cenerenti M, *et al.* Tumor-specific cytolytic CD4 T  
1087 cells mediate immunity against human cancer. *Sci Adv* **2021**;7(9) doi 10.1126/sciadv.abe3348.
- 1088 47. Synnestvedt K, Furuta GT, Comerford KM, Louis N, Karhausen J, Eltzschig HK, *et al.* Ecto-5'-  
1089 nucleotidase (CD73) regulation by hypoxia-inducible factor-1 mediates permeability changes  
1090 in intestinal epithelia. *J Clin Invest* **2002**;110(7):993-1002 doi 10.1172/JCI15337.
- 1091 48. Philip K, Mills TW, Davies J, Chen NY, Karmouty-Quintana H, Luo F, *et al.* HIF1A up-regulates  
1092 the ADORA2B receptor on alternatively activated macrophages and contributes to pulmonary  
1093 fibrosis. *FASEB J* **2017**;31(11):4745-58 doi 10.1096/fj.201700219R.
- 1094 49. Rahib L, Smith BD, Aizenberg R, Rosenzweig AB, Fleshman JM, Matrisian LM. Projecting cancer  
1095 incidence and deaths to 2030: the unexpected burden of thyroid, liver, and pancreas cancers  
1096 in the United States. *Cancer Res* **2014**;74(11):2913-21 doi 10.1158/0008-5472.CAN-14-0155.
- 1097 50. Mellman I, Coukos G, Dranoff G. Cancer immunotherapy comes of age. *Nature*  
1098 **2011**;480(7378):480-9 doi 10.1038/nature10673.
- 1099 51. O'Hara MH, O'Reilly EM, Varadhachary G, Wolff RA, Wainberg ZA, Ko AH, *et al.* CD40 agonistic  
1100 monoclonal antibody APX005M (sotigalimab) and chemotherapy, with or without nivolumab,  
1101 for the treatment of metastatic pancreatic adenocarcinoma: an open-label, multicentre,  
1102 phase 1b study. *Lancet Oncol* **2021**;22(1):118-31 doi 10.1016/S1470-2045(20)30532-5.
- 1103 52. Biasci D, Smoragiewicz M, Connell CM, Wang Z, Gao Y, Thaventhiran JED, *et al.* CXCR4  
1104 inhibition in human pancreatic and colorectal cancers induces an integrated immune  
1105 response. *Proc Natl Acad Sci U S A* **2020**;117(46):28960-70 doi 10.1073/pnas.2013644117.
- 1106 53. Bockorny B, Semenisty V, Macarulla T, Borazanci E, Wolpin BM, Stemmer SM, *et al.* BL-8040,  
1107 a CXCR4 antagonist, in combination with pembrolizumab and chemotherapy for pancreatic  
1108 cancer: the COMBAT trial. *Nat Med* **2020**;26(6):878-85 doi 10.1038/s41591-020-0880-x.
- 1109 54. Fong L, Hotson A, Powderly JD, Sznol M, Heist RS, Choueiri TK, *et al.* Adenosine 2A Receptor  
1110 Blockade as an Immunotherapy for Treatment-Refractory Renal Cell Cancer. *Cancer Discov*  
1111 **2020**;10(1):40-53 doi 10.1158/2159-8290.CD-19-0980.
- 1112 55. King RJ, Shukla SK, He C, Vernucci E, Thakur R, Attri KS, *et al.* CD73 induces GM-CSF/MDSC-  
1113 mediated suppression of T cells to accelerate pancreatic cancer pathogenesis. *Oncogene*  
1114 **2022**;41(7):971-82 doi 10.1038/s41388-021-02132-6.
- 1115 56. Hiraoka N, Ino Y, Sekine S, Tsuda H, Shimada K, Kosuge T, *et al.* Tumour necrosis is a  
1116 postoperative prognostic marker for pancreatic cancer patients with a high interobserver  
1117 reproducibility in histological evaluation. *Br J Cancer* **2010**;103(7):1057-65 doi  
1118 10.1038/sj.bjc.6605854.

1119

**A**

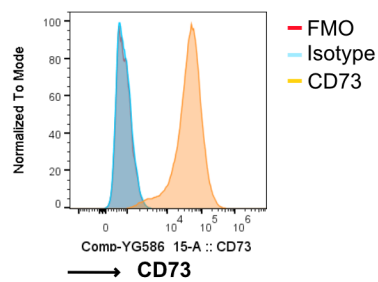

**B**

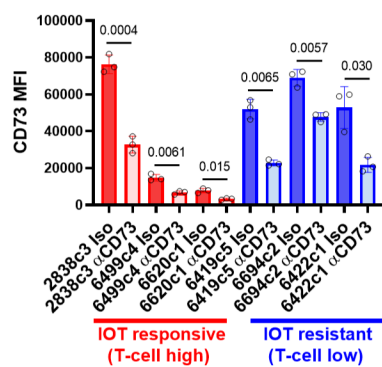

**D**

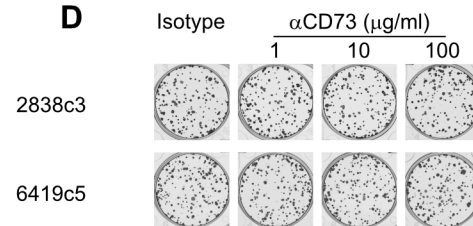

**C**

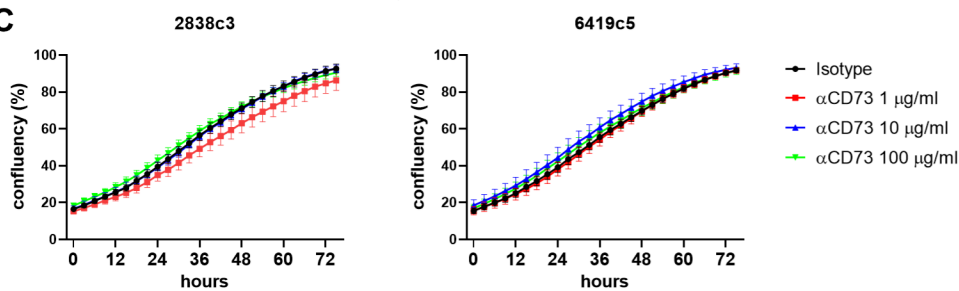

**E**

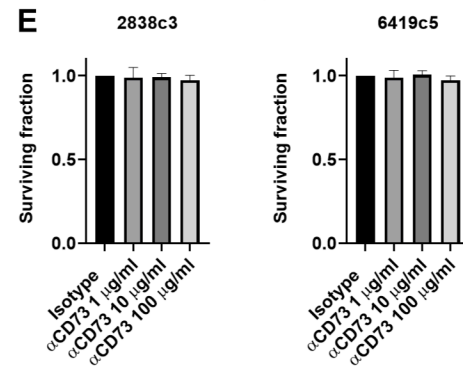

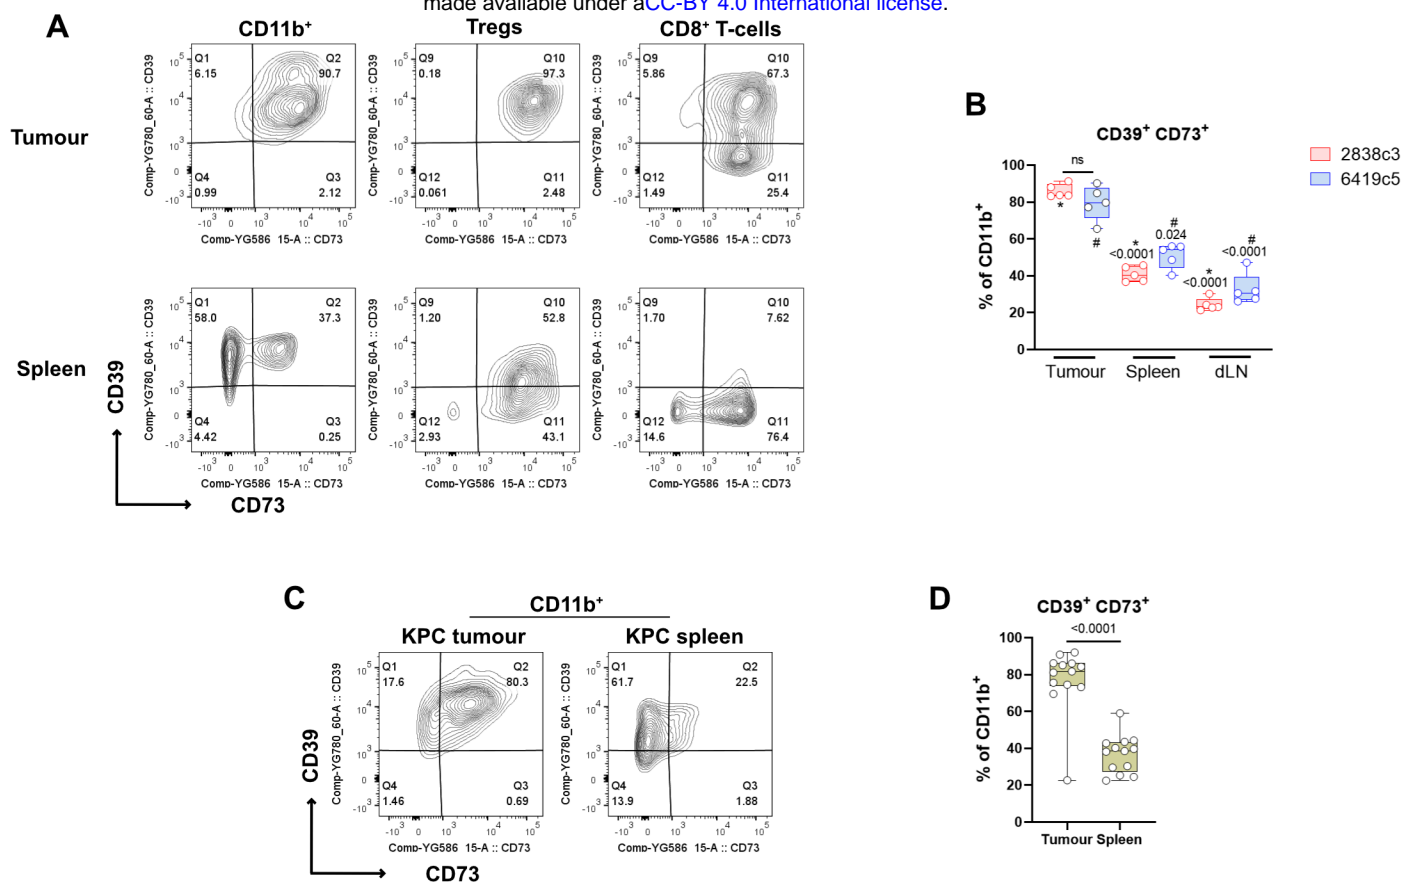

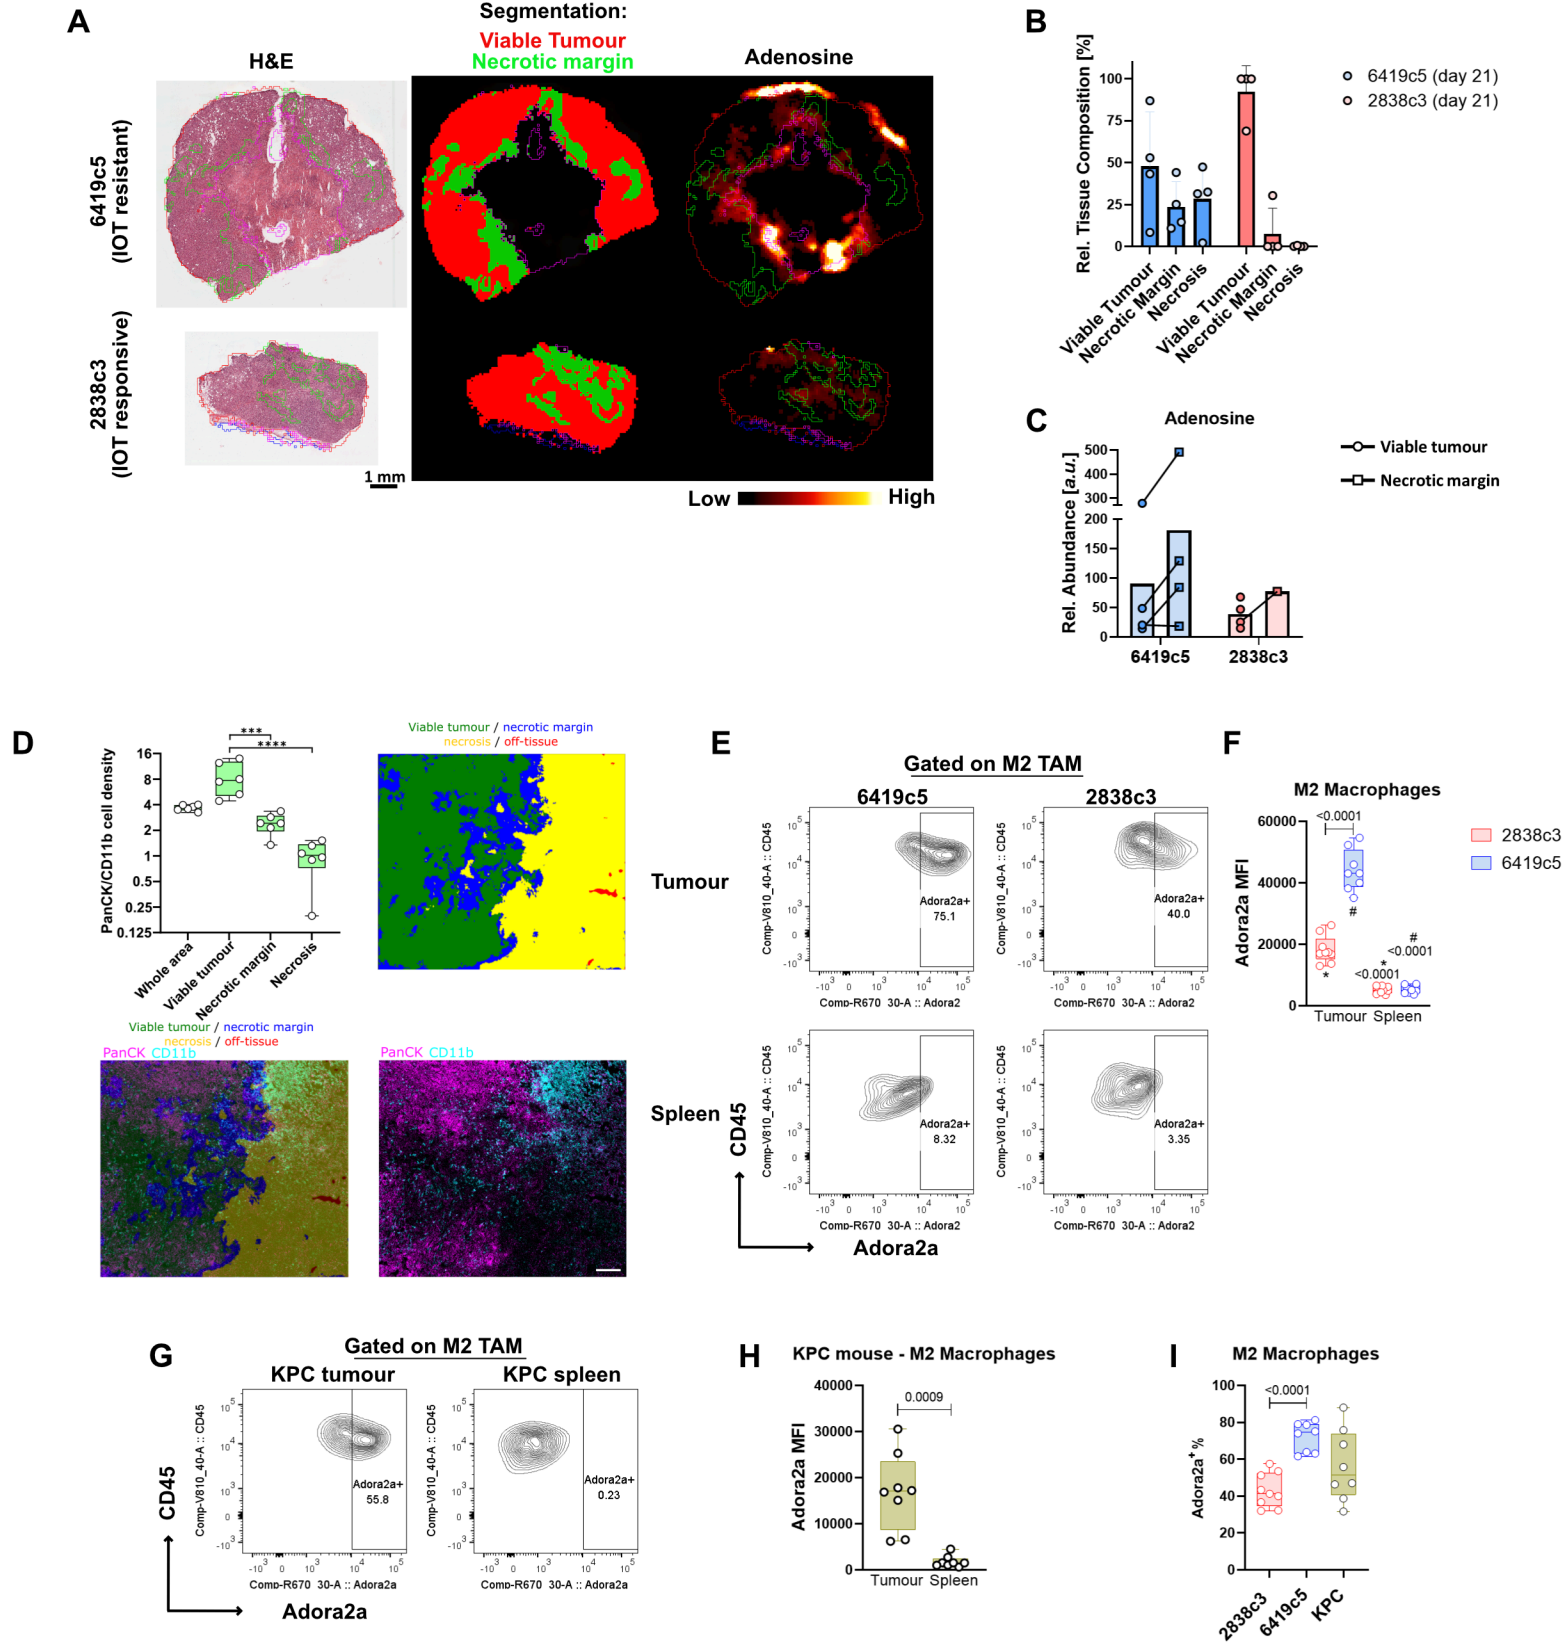

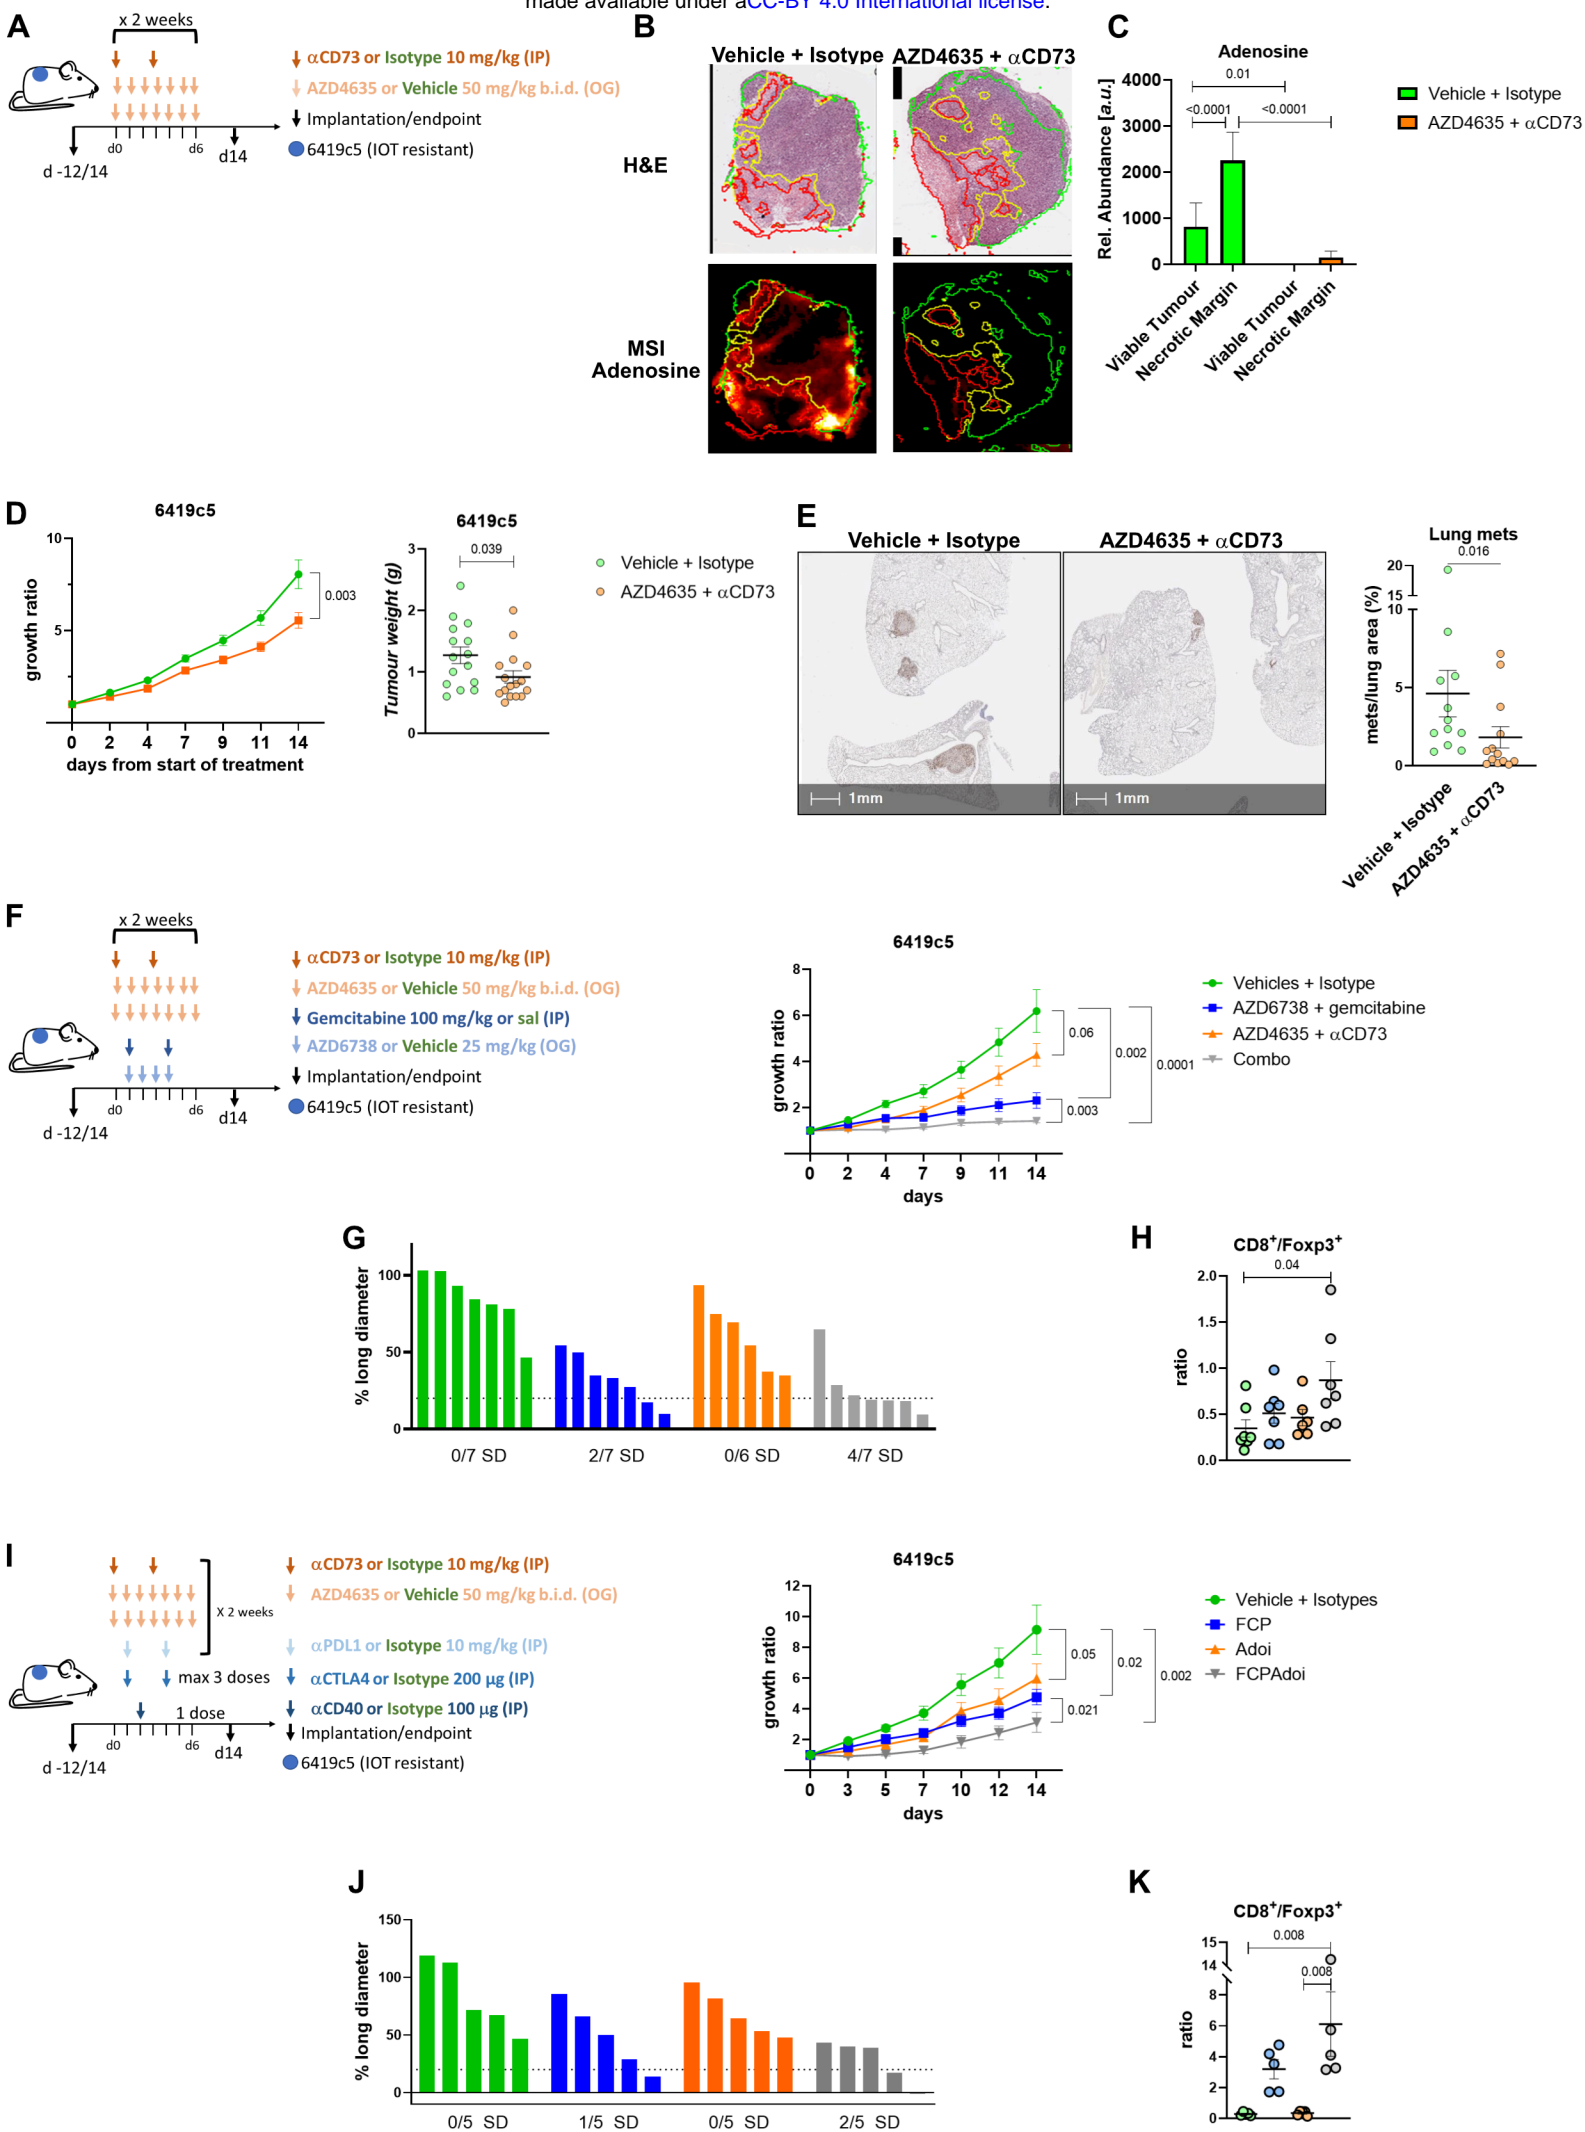

**A** Gated on Tumour Associated Macrophages

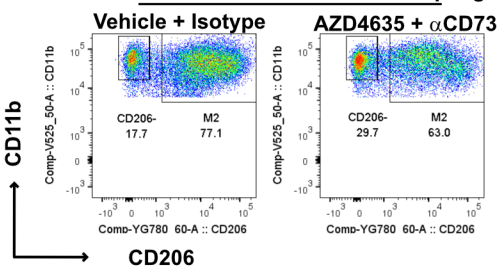

**B**

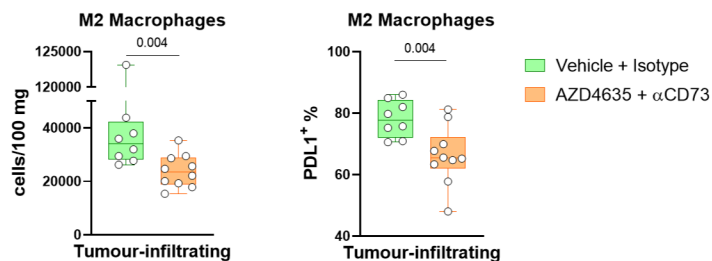

**C**

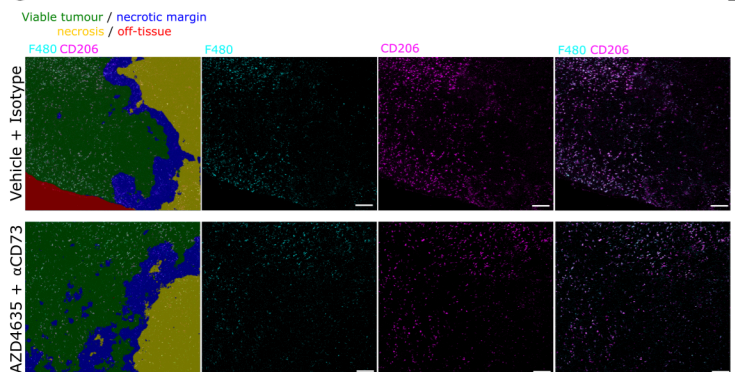

**D**

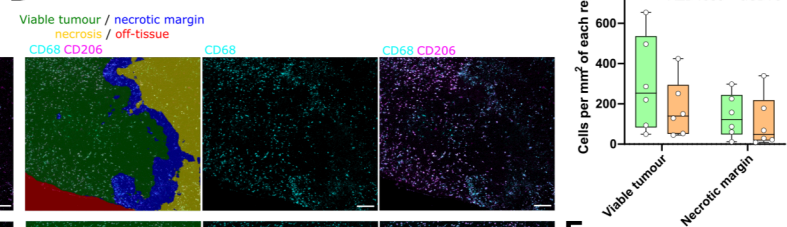

**E**

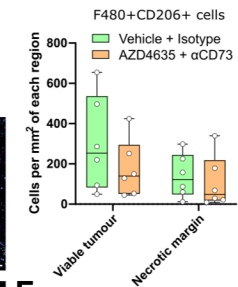

**F**

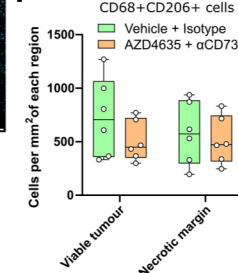

**G**

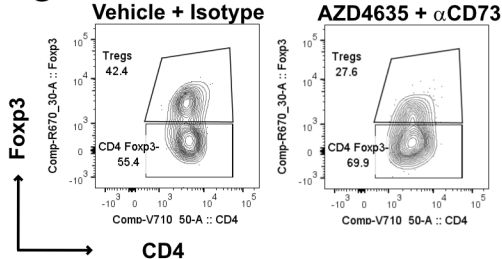

**H**

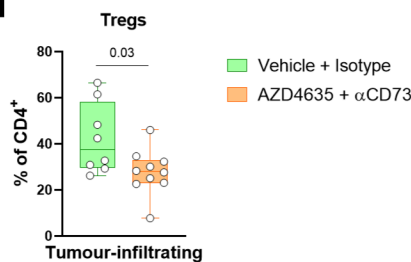



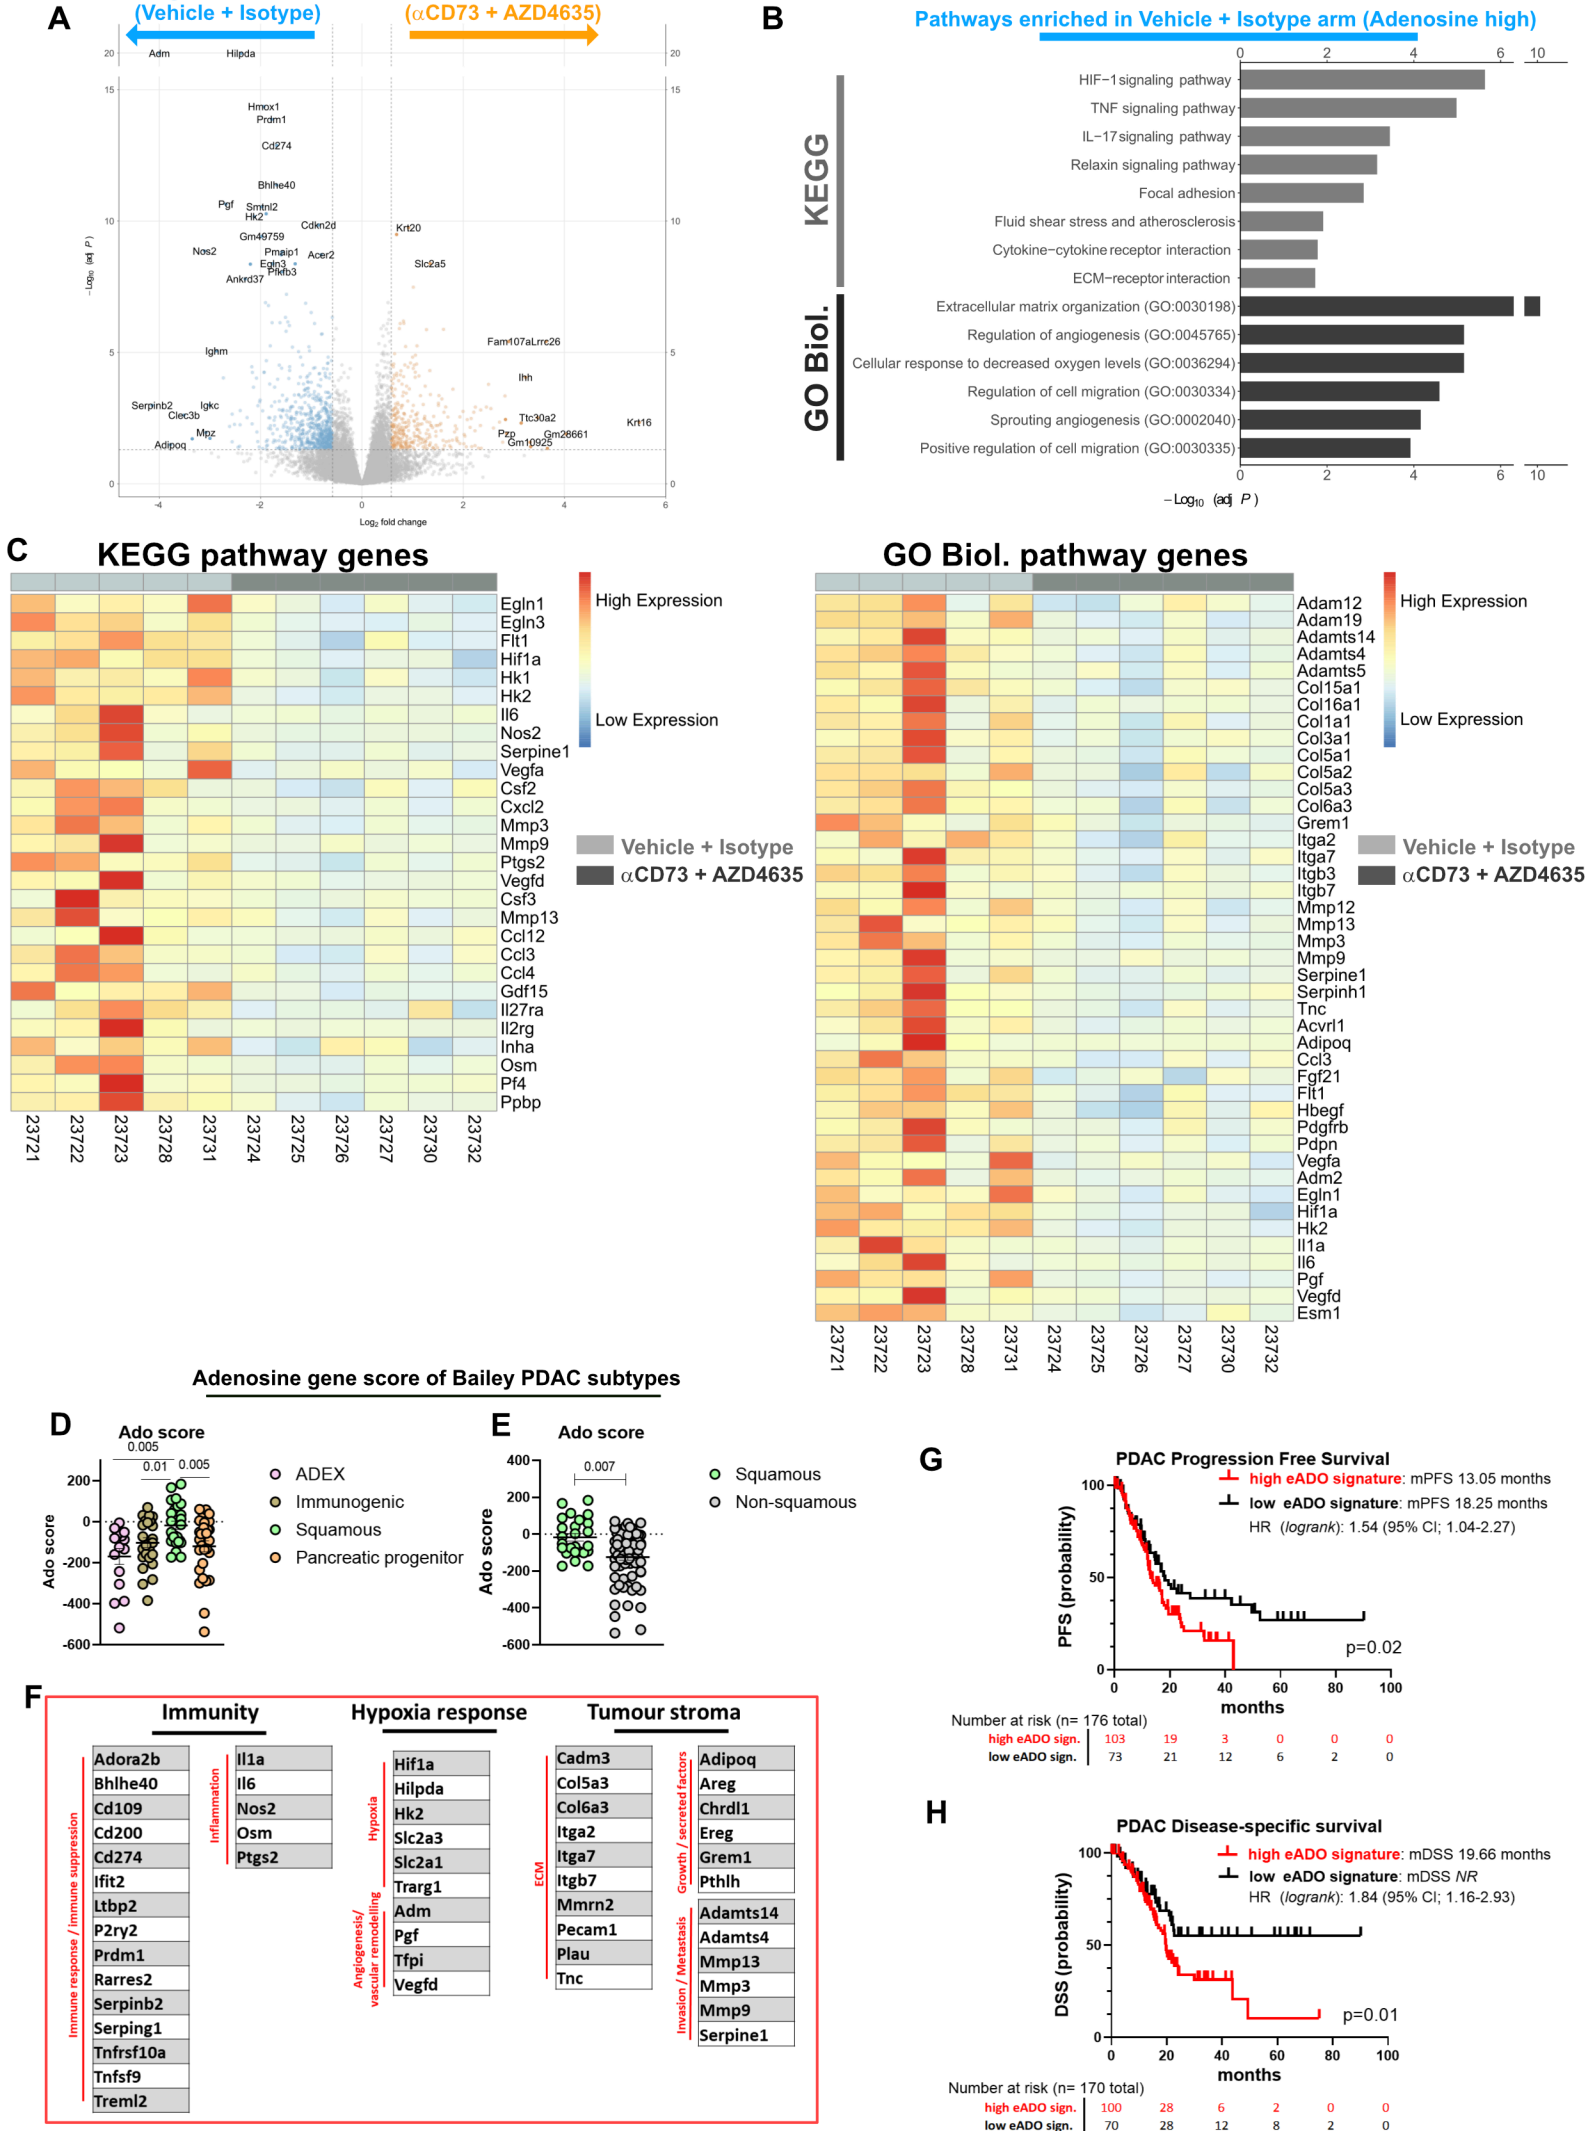

Source: https://www.biorxiv.org/content/10.1101/2022.05.24.493238v2.full.pdf
